# 1 **Predictability in the evolution of Orthopteran cardenolide** 2 **insensitivity**

3

4 Lu Yang<sup>1</sup>, Nitin Ravikanthachari<sup>2</sup>, Ricardo Mariño-Pérez<sup>3</sup>, Riddhi Deshmukh<sup>2</sup>, Mariana Wu<sup>1</sup>,  
5 Adam Rosenstein<sup>1</sup>, Krushnamegh Kunte<sup>2</sup>, Hojun Song<sup>3</sup>, Peter Andolfatto<sup>4\*</sup>

6

7 1. Department of Ecology and Evolutionary Biology, Princeton University, Princeton, NJ, USA, 08544.

8 2. National Centre for Biological Sciences, Tata Institute of Fundamental Research, Bengaluru, India.

9 3. Department of Entomology, Texas A&M University, College Station, Texas, USA, 77843.

10 4. Department of Biological Sciences, Columbia University, New York, NY, USA, 10027.

11

12 \* Correspondence: Lu Yang: [lyang24203@gmail.com](mailto:lyang24203@gmail.com), Peter Andolfatto: [pa2543@columbia.edu](mailto:pa2543@columbia.edu)

13

14 Keywords: Orthoptera, cardenolide, parallel evolution, Na<sup>+</sup>, K<sup>+</sup>-ATPase, toxin insensitivity, pleiotropy,  
15 adaptive protein evolution

16

17

18

## 1 **Abstract**

2 The repeated evolutionary specialisation of distantly related insects to cardenolide-containing  
3 host plants provides a stunning example of parallel adaptation. Hundreds of herbivorous insect  
4 species have independently evolved insensitivity to cardenolides, which are potent inhibitors of  
5 the alpha-subunit of Na<sup>+</sup>, K<sup>+</sup>-ATPase (ATP $\alpha$ ). Previous studies investigating ATP $\alpha$ -mediated  
6 cardenolide insensitivity in five insect orders have revealed remarkably high levels of parallelism  
7 in the evolution of this trait, including the frequent occurrence of parallel amino acid  
8 substitutions at two sites and recurrent episodes of duplication followed by neo-functionalisation.  
9 Here we add data for a sixth insect order, Orthoptera, which includes an ancient group of highly  
10 aposematic cardenolide-sequestering grasshoppers in the family Pyrgomorphidae. We find that  
11 Orthopterans exhibit largely predictable patterns of evolution of insensitivity established by  
12 sampling other insect orders. Taken together the data lend further support to the proposal that  
13 negative pleiotropic constraints are a key determinant in the evolution of cardenolide  
14 insensitivity in insects. Furthermore, analysis of our expanded taxonomic survey implicates  
15 positive selection acting on site 111 of cardenolide-sequestering species with a single-copy of  
16 ATP $\alpha$ , and sites 115, 118 and 122 in lineages with neo-functionalised duplicate copies, all of  
17 which are sites of frequent parallel amino acid substitution.

18

## 1 **Introduction**

2           Two enduring fundamental questions in modern evolutionary biology are *what factors*  
3 *limit the rate of adaptive evolution?* and *to what extent are adaptive evolutionary paths*  
4 *predictable?* [1] Theoretically, the predictability of adaptation depends on a number of factors  
5 that constrain the number of possible evolutionary paths. Among these is the number of potential  
6 targets for beneficial mutations [2–4]. However, the extent to which adaptation is constrained by  
7 mutation rate is unclear for most traits and some investigators have emphasised important roles  
8 for pleiotropy, the phenomenon by which one mutation affects multiple phenotypes, and  
9 epistasis, the effect of genetic background on the contribution of a mutation to a given  
10 phenotype, among other factors [1,5–7].

11           Evaluating the relative importance of these factors has been challenging. One approach  
12 has been to cobble together examples of adaptations from different traits in different species and  
13 contexts in an attempt to come to general conclusions (e.g. [8,9]). However, the heterogeneity  
14 inherent in such broad comparisons of different traits in different biological contexts may  
15 substantially limit the power to make inferences from such data [10]. An alternative is to  
16 examine cases on a trait-by-trait basis in the context of adaptation to common selective pressure  
17 [10]. Instances of parallel evolution, the independent evolution of similar features in different  
18 lineages, can provide multiple portraits of the evolutionary process and offer insight into the  
19 factors that constrain adaptation and the extent to which adaptive evolutionary paths are  
20 predictable.

21           Examples of parallelisms from nature are abundant and occur at different scales from the  
22 resemblance of morphological traits to individual nucleotide substitutions that encode regulatory  
23 or protein changes [4,11,12]. Such examples will have greater power to make inferences about  
24 the factors determining the dynamics of adaptation for a given trait as the number of independent

1 outcomes becomes larger, the more similar the selective pressure and the more is known about  
2 the genetic basis of the underlying trait. With these factors in mind, one fertile area for  
3 exploration is the repeated evolution of insensitivity of herbivorous insects to toxic secondary  
4 plant compounds. Plants are ubiquitously equipped with secondary chemical defences such as  
5 alkaloids, cyanogenic glucosides, and terpenoids that contribute to defence against herbivory  
6 [13,14]. Despite these defences, herbivorous insects have in many cases repeatedly evolved  
7 mechanisms to render them insensitive to toxic compounds [14,15], and even sequester toxins  
8 for their own use [16].

9         A striking example is presented by herbivorous insects that have repeatedly evolved the  
10 ability to feed on and, in many cases, sequester cardenolides from Apocynaceae plants, which  
11 include milkweed [15]. Cardenolides represent a class of steroidal glycosides (“cardiac  
12 glycosides”) that bind to and inhibit the alpha-subunit of  $\text{Na}^+$ ,  $\text{K}^+$ -ATPase ( $\text{ATP}\alpha$ ). This protein  
13 is a ubiquitously distributed membrane-bound ion active-transporter present in animals with  
14 well-known roles in a variety of physiological processes including neural signal transduction,  
15 muscle contraction and osmoregulation [17]. Conservation of the cardenolide-binding domain of  
16  $\text{ATP}\alpha$  among distantly-related animals, including vertebrates and invertebrates, suggests  
17 important physiological roles for the regulation of  $\text{Na}^+$ ,  $\text{K}^+$ -ATPase by endogenously produced  
18 cardenolides [17,18]. In fact, cardenolides have been used medicinally for hundreds of years as  
19 common treatments for conditions such as congestive heart failure and cardiac arrhythmias [18].  
20 A growing number of studies have implicated the regulation of  $\text{Na}^+$ ,  $\text{K}^+$ -ATPase by putatively  
21 endogenous cardenolides in signalling pathways linked to a variety of pathologies including  
22 hypertension and cancer [19,20].

23         Due to its medical importance, the interaction between  $\text{Na}^+$ ,  $\text{K}^+$ -ATPase and cardenolides  
24 has been well-studied. The binding of cardenolides arrests  $\text{Na}^+$ ,  $\text{K}^+$ -ATPase in the

1 phosphorylated state, where  $K^+$  cannot be bound,  $Na^+$  cannot be released to the extracellular side  
2 and ATP is not hydrolysed [21]. Mutagenesis experiments, enzyme-ligand co-crystal structures,  
3 and evolutionary analyses have implicated 41 amino acid residues of ATP $\alpha$ , scattered throughout  
4 the protein, that either directly interact with cardenolides or affect their binding-affinity  
5 indirectly (references listed in **Table S1**). These sites are largely concentrated near the site of  
6 cardenolide binding in ATP $\alpha$ , with some exceptions (**Figure S1**). As such, the evolution of  
7 cardenolide-insensitivity via the modification of ATP $\alpha$  (i.e. target-site insensitivity) is one of the  
8 rare traits for which we have a good *a priori* idea of the beneficial mutation target size for  
9 adaptation.

10 Broadly speaking, strategies employed by specialist herbivores to deal with toxin  
11 compounds include destroying and/or excreting the toxins [22,23], inactivating the toxins by  
12 chemical modifications [24], restricting the expression of the target protein to specific tissues  
13 [25,26], and/or the evolution of target-site insensitivity [24]. The evolution of ATP $\alpha$  insensitivity  
14 has so far been inferred in almost all Apocynaceae-specialist species surveyed from five insect  
15 orders, including Lepidoptera, Diptera, Coleoptera, Hymenoptera, and Hemiptera [27–33].

16 Studies of the evolution of ATP $\alpha$  insensitivity in these five insect orders have revealed a  
17 remarkable degree of convergence of molecular mechanism at multiple levels. First, despite the  
18 identification of 41 residues in the protein that could potentially modulate sensitivity of ATP $\alpha$  to  
19 cardenolides (**Table S1**), there is a marked enrichment of substitutions in Apocynaceae-  
20 specialists observed at two sites in the protein, Q111 and N122, that flank the H1-H2  
21 extracellular loop [30,33]; the substitutions Q111L, Q111T, Q111V and N122H occur in parallel  
22 in multiple lineages. Second, several rounds of duplication of ATP $\alpha$  have occurred in parallel in  
23 multiple species from three of the five surveyed insect orders, including Coleoptera, Hemiptera,  
24 and Diptera [30,33]. In each case, at least one of the divergent copies harbours a number of

1 cardenolide insensitivity-conferring substitutions [30,33,34]. Third, in most cases of ATP $\alpha$   
2 duplication, the copies have been shown to exhibit parallel evolution of tissue-specific  
3 expression patterns, with putatively less cardenolide-sensitive copies predominating in the gut,  
4 and putatively more sensitive copies predominating in nervous tissue [30].

5       Taken together, these data suggest a key role for negative pleiotropy in the evolution of  
6 cardenolide-insensitivity in Apocynaceae-specialists: those species with a single copy are largely  
7 limited to evolution at just a few of the 41 possible sites, but those with duplicates can explore  
8 many other evolutionary paths using one of the differentially expressed duplicate copies [30].  
9 Further support for the idea that negative pleiotropy plays a key role comes from site-directed  
10 mutagenesis studies demonstrating trade-offs in Na<sup>+</sup>, K<sup>+</sup>-ATPase function (e.g. efficiency of  
11 ATP hydrolysis) associated with some duplicate-specific substitutions observed in milkweed  
12 bugs (Hemiptera) [35].

13       The notion of predictability in evolution is often framed in terms of forecasting future  
14 events, for example, predicting the next steps in virus evolution [36]. However, it can also be  
15 used in the sense of looking at evolutionary patterns retrospectively and asking if a set of rules  
16 deduced from patterns of evolution in one group of organisms for a particular adaptation can  
17 reliably predict the genetic architecture of the same trait in another group. With this in mind, we  
18 survey a sixth insect order, the Orthoptera, which is phylogenetically positioned outside of the  
19 five insect orders that have previously been investigated (**Figure 1A**). Within Orthoptera, we  
20 focus on the family Pyrgomorphidae, commonly known as gaudy grasshoppers. This group is a  
21 relatively small group of approximately 500 species that include some of the most colourful and  
22 showy grasshoppers in the world (**Figure 1B-D**) [37]. Some members of this family that are  
23 known to feed on toxic plants, including Apocynaceae, possess aposematic colouration and are  
24 able to sequester plant secondary metabolites such as cardenolides and pyrrolizidine alkaloids

1 [38–41]. In addition to the aposematic colouration, some genera (such as *Phymateus*,  
2 *Poecilocerus*, *Zonocerus*) possess a unique mid-dorsal abdominal gland capable of squirting  
3 toxic chemical when disturbed, while others (*Aularches*, *Dictyophorus*, *Taphronota*) can produce  
4 foam as a result of haemolymph released through pores combined with air [41–44].

5         Studies of the common milkweed grasshopper *Poecilocerus bufonius* demonstrated that  
6 they were substantially less sensitive to the cardenolide ouabain injections (as measured by  
7 LD50) than species that do not feed on milkweed plants [45]. In addition, enzyme inhibition  
8 assays performed on extracts from *P. bufonius* suggest cardenolide insensitivity of Na<sup>+</sup>, K<sup>+</sup>-  
9 ATPase. In addition, observed heterogeneity among tissues in the degree of cardenolide-  
10 insensitivity was interpreted as possible evidence for distinct isoforms of the enzyme in this  
11 species [45]. While several species within Pyrgomorphidae show plant-mediated chemical  
12 defence, most of the species in the family do not possess aposematic colouration or feed on toxic  
13 plants [37], which presents an interesting opportunity to investigate the variation in cardenolide-  
14 insensitivity of ATP $\alpha$ .

15         To shed light on the evolution of cardenolide-insensitivity in Pyrgomorphidae, we  
16 generated RNA-Seq data for one representative grasshopper species from each of ten genera in  
17 the family and reconstructed the ATP $\alpha$  by *de novo* transcriptomic assembly [30]. We find  
18 remarkably similar patterns of amino acid substitution to those observed in previous surveys of  
19 Apocynaceae-specialist herbivores, including a duplication event followed by neo-  
20 functionalisation and tissue-specific differential expression in the genera *Phymateus* and  
21 *Poecilocerus*. This expanded dataset, now including data for 52 Apocynaceae-feeding species  
22 from six insect orders, further supports the view that adaptation in this system appears to be  
23 largely constrained by negative pleiotropic effects associated with otherwise adaptive

1 substitutions. The dataset also affords increased power to detect positive selection acting on  
2 specific sites in the protein that are also sites of recurrent parallel amino acid substitution.

3

#### 4 **Materials and Methods**

##### 5 **Sequencing and *de novo* transcriptome assembly**

6 For details on sample collection and preparation see **Table S2**. Dissections were carried  
7 out in Phosphate-buffered saline solution and stored either in TRIzol (Ambion, Life  
8 Technologies) or RNAlater (Ambion Inc.) at -80°C. For all insects, total RNA was extracted  
9 using TRIzol (Ambion, Life Technologies) following the manufacturer's protocol. RNA-seq  
10 libraries of *Aularches miliaris* and *Poekilocerus pictus* were prepared with TruSeq Stranded  
11 total RNA Library Prep Kit with Ribo-Zero Gold (Illumina) and sequenced on Illumina  
12 HiSeq2500 at AgriGenome (Cochin, Kerala, India). The libraries of *Taphronota calliparea* and  
13 *Dictyophorus griseus* were prepared with NEBNext Ultra RNA library Preparation Kit (NEB)  
14 and sequenced on Illumina HiSeq4000 (Genewiz, South Plainfield, NJ, USA). The libraries of  
15 *Chrotogonus hemipterus*, *Atractomorpha acutipennis*, *Zonocerus elegans*, *Phymateus leprosus*,  
16 *Ochrophlebia cafra*, and *Sphenarium purpurascens* were prepared with TruSeq RNA Library  
17 Prep Kit v2 (Illumina) and sequenced either on Illumina HiSeq4000 (Genewiz, South Plainfield,  
18 NJ, USA) or HiSeq2500 (Genomics Core Facility, Princeton, NJ, USA). Reads were trimmed  
19 for adapters, quality and length (Phred quality  $\geq 20$  and  $\geq 30$  contiguous bases) using  
20 TQSfastq.py  
21 (<http://code.google.com/p/ngopt/source/browse/trunk/SSPACE/tools/TQSfastq.py>). All  
22 transcriptomes were *de novo* assembled with Trinity 2.2.0 [46]. ATP $\alpha$  of *Locusta migratoria*  
23 (GenBank: KF813097.1) was used to query the assembled transcripts using BLAST (blast-



1 2.26). Reconstructions of ATP $\alpha$  for each species were used iteratively as query sequences to  
2 BLAST against each other using either tblastx or blastn to recover all ATP $\alpha$  copies.

3 We have also included previously unpublished full-length ATP $\alpha$  sequences for a number  
4 of other Apocynaceae-specialists including *Daphnis nerii* (Oleander Hawk-moth, Lepidoptera),  
5 *Empyreuma pugione* (Spotted Oleander Caterpillar Moth, Lepidoptera), *Euploea core* (the  
6 Common Crow, Lepidoptera), *Danaus chrysippus* (Plain Tiger, Lepidoptera), *Liriomyza*  
7 *asclepiadis* (Milkweed Leaf-Miner Fly, Diptera). The methods to reconstruct these sequences is  
8 identical to those used above following Zhen *et al.* [30]. Particular attention is paid to 41 sites  
9 implicated in cardenolide-insensitivity (**Table S1**) established based on site-directed mutagenesis  
10 and protein-ligand co-crystal structure studies.

11

## 12 **Discovery and confirmation of duplicates**

13 Given previous studies revealing duplications of ATP $\alpha$  associated with Apocynaceae-  
14 specialisation [30], we evaluated evidence for duplication in our Orthopteran species data. Two  
15 ancient lineages of ATP $\alpha$  (ATP $\alpha$ 1 and ATP $\alpha$ 2) precede the diversification of multiple insect  
16 orders and form a distinct clade from the duplications of ATP1A found in vertebrates [30].  
17 However, the expression level of ATP $\alpha$ 2 is low in insects surveyed to date and its function  
18 remains largely unknown. In *Drosophila melanogaster*, expression of ATP $\alpha$ 2 is limited to larval  
19 imaginal discs and adult male testes and accessory glands; RNAi and P-element knock-outs of  
20 the gene are homozygous viable but male-sterile (<http://www.flybase.org/reports/FBgn0267363>).  
21 Furthermore, we failed to recover an ortholog of ATP $\alpha$ 2 from the *Locusta migratoria* genome  
22 assembly [47], and several other Orthopteran assemblies [48,49], suggesting that the ATP $\alpha$ 1/ $\alpha$ 2  
23 duplication may have arisen after the split of Orthopterans from the other insects we have  
24 surveyed (**Figure 1A**). We thus decided to focus on ATP $\alpha$ 1, which shows clear orthology across

1 taxa and a strong correlation between evolution at known cardenolide-sensitivity sites in the  
2 protein and specialisation on cardenolide-containing Apocynaceae plants [30].

3 The discovery of duplicated copies of ATP $\alpha$ 1 in *Poekilocerus pictus* and *Phymateus*  
4 *leprosus* was verified by cloning and sequencing. Total RNA was extracted as described above,  
5 and reverse-transcribed to single-strand cDNA using SuperScript® III Reverse Transcriptase  
6 (Thermo Fisher Scientific). ATP $\alpha$ 1 was PCR-amplified using Phusion High-Fidelity DNA  
7 Polymerase (Thermo Fisher Scientific) using forward primer: 5'-  
8 ACATGGCGGCAAGAAGAAAG-3' and reverse primer: 5'-  
9 AGTAGGGGAAGGCACAGAAC-3'. The PCR product was cleaned using QIAquick PCR  
10 Purification Kit (Qiagen), 3'A-tailed using Taq polymerase (NEB) and cloned into TOPO TA  
11 vector (Invitrogen) following the manufacturer's instructions. Ampicillin-resistant colonies were  
12 picked and screened by colony-PCR for the presence of inserts on a 1% agarose gel. Libraries of  
13 plasmids were constructed using Tn5 transposase [50] annealed with Tn5ME-A, 5'-  
14 TCGTCGGCAGCGTCAGATGTGTATAAGAGACAG-3' and Tn5ME-B, 5'-  
15 GTCTCGTGGGCTCGGAGATGTGTATAAGAGACAG-3' and indexed with customised  
16 Illumina i7, i5. Paired-end 150 nt reads were collected for the pooled library on an Illumina  
17 MiSeq Nano (Genomics Core Facility, Princeton University). *De novo* transcriptome assembly  
18 was performed with Velvet/Oases [51,52] using a random sub-sample of 10,000 reads for each  
19 indexed plasmid.

20

## 21 **Differential expression analysis**

22 Head, muscle, and foregut tissues of three male and three female *Poekilocerus pictus*  
23 were dissected and sequenced in two batches (see sample collection and sequencing). Adapter  
24 and quality trimmed reads were mapped back to our *de novo* assembly of the transcriptome as a

1 reference (including ATP $\alpha$ 1A and ATP $\alpha$ 1B) using bwa mem [53] with default criteria, processed  
2 with SAMtools 0.1.18 [54] and mapped reads were counted with HTSeq 0.6.1 [55]. We used the  
3 inverted beta-binomial (ibb) test [56] to determine the significance of difference of expression  
4 level between tissues. The method uses a negative binomial distribution in a generalised linear  
5 model framework for paired-sample testing. We applied a standard Bonferroni correction to  
6 account for multiple tests. Paired-sample count data were normalised by either total number of  
7 mapped reads or the sum of reads mapping to ATP $\alpha$ 1A and ATP $\alpha$ 1B (**Table S3**).

8

### 9 **Re-analysis of Lygaeid ATP $\alpha$ 1 evolution and expression.**

10 Using the recently completed *Oncopeltus fasciatus* genome [57], we detected a fourth  
11 copy of ATP $\alpha$ 1 (ATP $\alpha$ 1D) in these Lygaeid bugs that was missed by previous studies. Lygaeid  
12 ATP $\alpha$ 1D is the least-derived copy at sites implicated in cardenolide-sensitivity and is expressed  
13 in *O. fasciatus* heads, yet has the lowest expression of the four copies (**Figure 3A**). We also  
14 confirmed that, like copies A-C, ATP $\alpha$ 1D is also shared with *Lygaeus kalmii* (a sister-genus  
15 species) but we could only partially reconstruct it from our *de novo* transcriptome assembly due  
16 to its low expression. Using RNA-seq data for *O. fasciatus*, we confirmed the finding of  
17 differential expression of duplicates documented by Zhen *et al.* [30] (**Figure S3A**). All four  
18 copies of ATP $\alpha$ 1 in the Lygaeid *O. fasciatus* are more highly expressed in the head than the gut.  
19 The putatively most sensitive copy (ATP $\alpha$ 1D), despite having the lowest expression level of the  
20 four copies, exhibits the greatest degree of up-regulation in the head relative to other copies  
21 (**Figure S3B**).

22

### 23 **Evolutionary analyses**

24 The ages of the duplicates were calculated from dS (the per site rates of substitution at

1 synonymous sites) estimated using PAML4.8 codeml [58], with prior trees based on established  
2 cladistic relationships (Mariño-Pérez *et al*, unpublished, [59]) and calibrated with divergence  
3 times obtained from [www.timetree.org](http://www.timetree.org) (*Locusta* and Pyrgomorphidae: 117.4 Mya; *Napomyza*  
4 and *Phytomyza*: 39 Mya). The divergence times of the Large Milkweed Bug (*Oncopeltus*  
5 *fasciatus*), Milkweed Stem Weevil (*Rhyssomatus lineaticollis*), and Dogbane Beetle (*Chrysochus*  
6 *auratus*) are taken from [30] where similar methods were used to date duplicates. In the Lygaeid  
7 bugs (*O. fasciatus* and *L. kalmii*), a phylogenetic analysis strongly suggests a duplication order  
8 ((ABC),D), ((AB),C) and most recently (A,B).

9 To obtain distributions of lineage-specific evolutionary rates, ATP $\alpha$ 1 lineages were  
10 grouped into four categories. ATP $\alpha$ 1 of all non-specialist species were denoted as "Outgroup".  
11 ATP $\alpha$ 1 of Apocynaceae-specialists with a single copy of ATP $\alpha$ 1 are denoted "Single". For  
12 specialists with multiple copies of ATP $\alpha$ 1, copies that are up-regulated in the gut relative to the  
13 head are assumed to be relatively cardenolide-insensitive copies and marked as Dup<sup>I</sup> [30].  
14 Likewise, those up-regulated in the head relative to the gut are assumed to be relatively sensitive  
15 copies and were grouped as Dup<sup>S</sup>. We chose this criterion rather than the number of  
16 insensitivity-conferring substitutions because using the latter makes the designation of copies  
17 with intermediate numbers of substitutions ambiguous. In Lygaeid bugs (*O. fasciatus* and *L.*  
18 *kalmii*), this implies that copies A and B are treated as relatively insensitive copies (Dup<sup>I</sup>),  
19 whereas C and D are treated as relatively sensitive (Dup<sup>S</sup>) (**Figure S3**). The dN/dS ratios  
20 ( $\omega$ ) for ATP $\alpha$ 1 along a lineage were estimated within each insect order using PAML codeml  
21 under free ratio model. Parameters were set as follows: seqtype = 1, model = 1, NSsites = 0,  
22 clock = 0, CodonFreq = 2, fix\_kappa = 0, kappa = 2.0, fix\_omega = 0, omega = 0.02.  
23 Differences in the distribution of branch-specific estimates of  $\omega$  between each group were  
24 tested with Dunn's test of multiple comparisons using rank sums as implement in R (dunn.test).

1 We also evaluated evidence for positive selection acting on individual sites of ATP $\alpha$ 1  
2 using PAML codeml. To do this, we defined and investigated several models (**Figure 7, Table**  
3 **S4**). Model 1: positive selection on all Apocynaceae-specialist lineages; Model 2: positive  
4 selection on all Apocynaceae-specialist lineages with single copies of ATP $\alpha$ 1 (including  
5 ancestral lineages prior to duplication); Model 3: positive selection on Dup<sup>S</sup> and Dup<sup>L</sup> lineages of  
6 Apocynaceae-specialists; Model 4: positive selection on Dup<sup>L</sup> lineages of Apocynaceae-  
7 specialists; Model 5: positive selection on all outgroup lineages. Tests were carried out using the  
8 modified branch-site model A implemented in codeml [60–62] with parameters set as follows:  
9 seqtype = 1, model = 2, NSsites = 0, clock = 0, CodonFreq = 2, fix\_kappa = 0, kappa = 2.0,  
10 fix\_omega = 0, omega = 0.02. The ancestral sequences of duplicated ATP $\alpha$ 1 were reconstructed  
11 with the function RateAncestor. Unrooted trees were used, and branch labels were added  
12 manually for each model. The method assigns each codon a Bayes Empirical Bayes (BEB)  
13 posterior probability that the codon belongs to a site class with omega > 1 (i.e. indicating  
14 positive selection). A BEB posterior probability of >0.95 was considered evidence for positive  
15 selection.

16

## 17 **Results**

### 18 **Survey of ATP $\alpha$ 1 of 15 Orthopteran genera**

19 Using an RNA-seq-based gene discovery method, we reconstructed the complete coding  
20 sequences of the alpha subunit of Na<sup>+</sup>, K<sup>+</sup>-ATPase (ATP $\alpha$ 1) of grasshoppers from species  
21 representing ten genera in the family Pyrgomorphidae, as well as five outgroup species within,  
22 and one outside, the order Orthoptera (**Figure 2**). Our broad survey of Apocynaceae-feeding  
23 Pyrgomorphidae revealed few amino acid substitutions among the 41 sites implicated in  
24 cardenolide-sensitivity (**Table S1**). The two most broadly distributed substitutions, Q111L and

1 A119S, correlate only weakly with Apocynaceae-feeding, aposematism, and the presence of  
2 abdominal defensive glands in the group. The glaring exception is the lineage leading to the  
3 genera *Poekilocerus* and *Phymateus*, both containing multiple species, which appear to share a  
4 duplication of ATP $\alpha$ 1. Both species surveyed retain an ancestral version of the protein  
5 (ATP $\alpha$ 1B) while having a highly-derived copy (ATP $\alpha$ 1A). The diverged ATP $\alpha$ 1A copies of  
6 *Poekilocerus* and *Phymateus* share many amino acid substitutions relative to the ancestral copy,  
7 several at sites implicated in cardenolide-sensitivity. Phylogenetic analysis clearly indicates that  
8 the duplication of ATP $\alpha$ 1 and functional divergence of ATP $\alpha$ 1A predates the diversification of  
9 these clades into separate genera and species and we estimate the age of the duplication to be ~36  
10 million years old.

11

## 12 **Patterns of amino acid substitution in ATP $\alpha$ 1 of Orthopterans**

13 Cross-referencing the pattern in Orthopterans with other Apocynaceae-specialists  
14 surveyed in other insect orders reveals a high level of parallel amino acid substitution (**Figure 3,**  
15 **Figure S2**). Conspicuous among these are two parallel substitutions Q111L and A119S, which  
16 appear to pre-date the diversification of the Pyrgomorphidae. Cell transfection experiments have  
17 shown when substitutions at position 111 are introduced to a sensitive background of the *D.*  
18 *melanogaster* protein, the survival rate of HeLa cells increases 3 to 8-fold [31]. Interestingly,  
19 A119S is observed in almost every Apocynaceae-specialist species that has been surveyed to  
20 date (**Figure S2**), including the *Drosophila subobscura* subgroup where resistant forms of  
21 ATP $\alpha$ 1 have been documented segregating as polymorphisms within *D. subobscura* [63].  
22 Exceptions include aphids (*Aphis nerii* and *Acrythosiphon pisum*), the milkweed leaf beetle  
23 (*Labidomera clivicolis*) and several Hymenopteran species that harbour the similar substitution,  
24 A119N. Q111L and A119S are not associated with cardenolide-feeding or Apocynaceae-

1 specialisation in the Orthoptera and are possessed by a number of non-aposematic species not  
2 known to feed on cardenolide-containing plants (e.g. *L. migratoria*, *C. hemipterus*, *A.*  
3 *acutipennis*). The substitutions Q111L, A119S, and A119N also occur sporadically among a  
4 number of other insects not known to feed on Apocynaceae (**Figure S2**).

5         Considering the cardenolide-insensitive ATP $\alpha$ 1A copy-specific substitutions of  
6 *Poekilocerus* and *Phymateus*, N122H stands out as a substitution observed in parallel in many  
7 other Apocynaceae-specialists including at least one member of each of the six insect orders  
8 surveyed. The N122H substitution in isolation has been shown to increase *Drosophila* ATP $\alpha$ 1  
9 insensitivity to the cardenolide ouabain by 250-fold [64] and increase survival of HeLa cells  
10 challenged with ouabain [31]. N122H has also been reported to interact synergistically with  
11 substitutions at Q111, though Q111L was not tested [31]. The Orthopteran ATP $\alpha$ 1A copy-  
12 specific substitutions V115T, P118S, D121N, I315V and L874M also occur in at least one other  
13 insect order. Of these, D121N is known to decrease cardenolide-sensitivity by ~100-fold [65].

14

### 15 **Unique substitutions associated with duplication of ATP $\alpha$ 1 and differential expression of** 16 **neo-functionalised copies.**

17         Using data from three insect orders, Zhen *et al.* [30] found a significant enrichment of  
18 unique substitutions at sites implicated in cardenolide-sensitivity in Apocynaceae-specialist  
19 lineages with duplicated copies of ATP $\alpha$ 1 compared to those that retain a single copy. They also  
20 documented convergent patterns of differential gene expression of independently derived  
21 duplicates found in specialists. Specifically, they noted that duplicates inferred to be the most  
22 sensitive to cardenolides, based on the number of substitutions at sites implicated in cardenolide-  
23 insensitivity, consistently exhibited up-regulation in the head relative to the gut. Zhen *et al.* [30]  
24 argued that this might be expected since the gut is the site of first-processing of cardenolides and

1 sensitive forms of ATP $\alpha$ 1 in nervous tissue are likely protected to some extent by the blood-brain  
2 barrier provided by the glial sheath surrounding neurons [30,66]. Zhen *et al.* [30] interpreted this  
3 pattern as being consistent with a key role for pleiotropy in the evolution of cardenolide-  
4 insensitivity. Specifically, they proposed that there might be trade-offs in enzyme performance  
5 associated with unique substitutions that are ameliorated by differential expression of neo-  
6 functionalised duplicate copies. Here, we re-evaluate this claim in the context of our expanded  
7 dataset, which now includes Orthoptera and previously published data for five other insect  
8 orders.

9         Despite the remarkable parallelism at the levels of gene duplication and amino acid  
10 substitutions, it is notable that “unique” substitutions (i.e. those unique to one lineage) at sites  
11 implicated in cardenolide-sensitivity in Orthoptera are restricted to duplicated copies, as  
12 observed in other Apocynaceae-specialists with duplications. Notably, ATP $\alpha$ 1A of *Poekilocerus*  
13 and *Phymateus* share a unique two amino acid insertion between residues 119 and 120 of the  
14 ancestral protein (**Figure 2**). Insertions or deletions have not been observed so far among the  
15 other five insect orders surveyed to date (**Figure 3, Figure S2**). Furthermore, *Phymateus*  
16 *leprosus* harbours an additional amino acid substitution (D120E) that also appears to be unique  
17 among Apocynaceae-specialists. Notably, no unique substitutions were observed among the  
18 other 12 Orthopteran species surveyed that appear to retain a single copy of ATP $\alpha$ 1.

19         We also find that the functionally diverged duplicates of ATP $\alpha$ 1 in the Orthopteran  
20 *Poekilocerus pictus* are differentially expressed in a similar manner to those found in Lygaeid  
21 bugs (see Methods) and other Apocynaceae-specialists [30]. Specifically, the putatively less  
22 cardenolide-sensitive copy (ATP $\alpha$ 1A) is up-regulated relative to the more sensitive copy  
23 (ATP $\alpha$ 1B) in the gut compared to muscle and head (**Figure 4**). The cardenolide-sensitive copy  
24 ATP $\alpha$ 1B accounts for 18.7% of total ATP $\alpha$ 1 expression in the brain but only 2.2% in the foregut,



1 which is the primary location of cardenolide processing. This finding is consistent with previous  
2 studies of the related *Poekilocerus* species, *P. bufonius*, that noted Na<sup>+</sup>, K<sup>+</sup>-ATPase activity of  
3 the brain was more sensitive to cardenolide-inhibition than that of the gut [45]. Since the  
4 duplication of ATPα1 appears to predate the diversification of *Poekilocerus*, it is highly likely  
5 that the tissue-specific ouabain-sensitivity can be explained by the presence of the same  
6 duplication we have documented here.

7       Having established tissue-specific expression of duplicate copies in Lygaeids (see  
8 Methods) and Orthopterans, we then re-visited the pattern of unique versus parallel substitution  
9 with respect to duplication status and differential expression of ATPα1 in the full dataset now  
10 spanning six insect orders (**Figure 5**). Consistent with Zhen *et al.* [30], we find a marked  
11 enrichment of unique substitutions at sites implicated in cardenolide-sensitivity in Apocynaceae-  
12 specialists with duplicated copies of ATPα1 (Fisher's exact test P=0.0022). Examining the  
13 pattern in more detail, it is apparent that unique substitutions appear to be unequally distributed  
14 among copies. In each case of duplication, we can distinguish between less-sensitive and more-  
15 sensitive copies based on the number of derived amino acid-substitutions that have been  
16 implicated in cardenolide-sensitivity. We find a significant enrichment of unique substitutions in  
17 the dataset (13/14) occur on putatively less-sensitive copies of ATPα1 that are substantially more  
18 expressed in the gut than more-sensitive copies (in the 4/5 cases where expression patterns have  
19 been investigated).

20

### 21 **Relaxed constraints on ATPα1 duplicates and positive selection for insensitivity.**

22       It is clear from the above analyses that the evolution of cardenolide-insensitivity in some  
23 taxa is facilitated by duplication and differential expression of ATPα1, which is expected to relax  
24 constraints at sites known to confer insensitivity but are associated with negative pleiotropic

1 effects. We further carried out a phylogenetic analysis to ask 1) whether this relaxation in  
2 constraint extends beyond sites directly implicated in cardenolide insensitivity, and 2) whether  
3 there is evidence for positive selection associated with Apocynaceae-specialisation at these and  
4 other sites in the protein. To examine patterns of constraint in more detail, we grouped both  
5 external and internal branches of the ATP $\alpha$ 1 phylogeny into four categories: Outgroup;  
6 Apocynaceae-specialist lineages with a single ATP $\alpha$ 1 copy (Single), and Apocynaceae-specialist  
7 lineages harbouring duplications that are inferred to be either relatively sensitive (Dup<sup>S</sup>), or  
8 relatively insensitive (Dup<sup>I</sup>) to cardenolides (see Methods). Examining the distributions of  
9 omega (dN/dS) estimates among these classes reveals that putatively less sensitive copies of  
10 ATP $\alpha$ 1 (Dup<sup>I</sup>) evolve ~5-fold faster than their more sensitive counterparts (**Figure 6**). We find  
11 that this pattern persists if we exclude the sites directly implicated in cardenolide-sensitivity  
12 (**Figure S4**), implying that relaxation of constraint on derived copies extends beyond this class of  
13 sites in the protein.

14 We next asked whether relaxed constraint in Apocynaceae-feeding lineages, or on  
15 insensitive duplicate ATP $\alpha$ 1 lineages, is sufficient to account for the data or whether there is  
16 evidence for positive selection associated with insensitivity-conferring amino acid substitutions.  
17 We conducted a site-specific scan for positively selected substitutions using the improved branch  
18 site model implemented in PAML (see Methods). Site 111, a site directly implicated in  
19 cardenolide insensitivity and the target of frequent parallel amino acid substitution across insect  
20 orders, is identified as positively selected in this analysis under models assuming either positive  
21 selection in Apocynaceae-specialists, or only on Apocynaceae-specialist lineages bearing a  
22 single copy of ATP $\alpha$ 1 (BEB posterior probability  $\approx$  1.0 under both models, **Figure 7, Table S4**).  
23 Sites 115, 118 and 122, also directly implicated in cardenolide-sensitivity, are identified as  
24 positively selected under models of positive selection on the Dup<sup>I</sup> lineages of ATP $\alpha$ 1 (BEB

1 posterior probabilities of 0.956, 0.998 and 0.993, respectively, **Figure 7**). Interestingly, evidence  
2 for positive selection also emerges at several sites in the protein not previously implicated in  
3 cardenolide-sensitivity. Seven sites show evidence for positive selection in lineages bearing  
4 duplicate copies of ATP $\alpha$ 1 including a cluster of three sites (560, 563, and 566) that are located  
5 far from the cardenolide-binding domain (**Table S4, Figure S1**).

6

## 7 **Discussion**

8 Predictability in evolutionary biology not only refers to being able to forecast future  
9 evolutionary events but is also a statement about the ability to predict the genetic basis of  
10 adaptations outside a taxonomic group in which the rules governing the genetic basis of a  
11 particular adaptation were deduced. Previous surveys of ATP $\alpha$ 1 in the context of insect  
12 adaptation to cardenolides established that, despite a reasonably large target size for evolving  
13 target-site insensitivity (i.e. 41 sites implicated in cardenolide-sensitivity, **Table S1**), a small  
14 proportion of these sites (and sites 111 and 122 in particular) are disproportionately used in the  
15 evolution of insensitivity to cardenolides [30]. The exception to this pattern is found in insects  
16 that have duplicated ATP $\alpha$ 1 and differentially allocate a functionally-diverged copy to the gut,  
17 while retaining an ancestral copy that is more highly expressed in the head.

18 To test the generality of these patterns as predictors, we surveyed aposematic  
19 grasshoppers that sequester cardenolides belonging to Orthoptera, which is the first  
20 Polyneopteran order to be examined for cardenolide insensitivity (**Figure 1**). Of the 10 species of  
21 Pyrgomorphidae included in the analysis, six species have been reported to feed on Apocynaceae  
22 and exhibit aposematic colouration and chemical defence (**Figure 2**). The remaining four species  
23 feed on non-toxic plants and show cryptic colouration. While we initially expected all  
24 Apocynaceae-feeding species to show substitutions at sites implicated in cardenolide-

1 insensitivity, we found that most Orthopteran species harbour only two substitutions (Q111L and  
2 A119S), that are not correlated with consumption and/or sequestration of cardenolide-containing  
3 plants in this group. The specific substitution Q111L appears to only weakly confer insensitivity  
4 to cardenolides based on previous functional studies. Furthermore, A119S does not interact with  
5 cardenolides directly or have an effect on cardenolide-affinity, although it does contribute to  
6 more rapid association/dissociation kinetics of the cardenolide ouabain [67]. Given this and their  
7 broader phylogenetic distribution (**Figure 3, Figure S2**), it is possible that these ancient and  
8 recurrent substitutions represent exaptations [68] that facilitate the evolution of more resistant  
9 forms of ATP $\alpha$ 1 in some insect lineages [29].

10         Nevertheless, two of the six species (*Poekilocerus* and *Phymateus*) do share a duplication  
11 (ATP $\alpha$ 1A) that exhibits multiple amino-acid substitutions known to confer insensitivity to  
12 cardenolides. Why amino acid substitutions with large effects on cardenolide sensitivity or  
13 insensitive duplicates of ATP $\alpha$ 1 are not found in the other four Apocynaceae-feeding species  
14 deserves an explanation. Of the six Apocynaceae-feeding species included in this study,  
15 *Phymateus*, *Poekilocerus*, and *Zonocerus* have the mid-dorsal abdominal glands used for  
16 chemical defence [41] and they form a monophyletic group within the phylogeny of  
17 Pyrgomorphidae [37]. So far, cardenolides have been reported in the defence secretion from only  
18 *Phymateus* and *Poekilocerus* [41], and their common names, milkweed grasshoppers, suggest a  
19 strong association of these insects with the host plant. Although *Zonocerus* do feed on  
20 cardenolide-containing plants, their main defence chemical is pyrrolizidine alkaloid [69–71],  
21 rather than cardenolides. *Zonocerus variegatus* only excretes cardenolides when the toxins are  
22 included in its diet [72]. The other three Apocynaceae-feeding species (*Aularches*, *Dictyophorus*,  
23 and *Taphronota*) do not have specialised abdominal glands, but produce toxic foams through  
24 various pores on the thorax and abdomen [41]. It is unknown whether they use cardenolides as

1 their main chemical defence. The lack of cardenolide insensitivity of Na<sup>+</sup>, K<sup>+</sup>-ATPase in  
2 *Zonocerus*, *Aularches*, *Dictyophorus*, and *Taphronota* seems to suggest that they rely on other  
3 unknown mechanisms to cope with the toxicity of Apocynaceae. It is possible that while they are  
4 capable of consuming Apocynaceae, they might prefer a mixture of other toxic plants containing  
5 different kinds of secondary compounds to confer toxicity. Though the chemical ecology of these  
6 insects is under-studied, we can postulate that, at least in Pyrgomorphidae, only those species  
7 that are intimately associated with Apocynaceae have evolved the cardenolide insensitivity of  
8 Na<sup>+</sup>, K<sup>+</sup>-ATPase.

9         Considering the full dataset now including data from six insect orders, our study confirms  
10 previous findings [30] suggesting that, when ATPα1 has been duplicated, unique substitutions at  
11 known functionally important sites are significantly enriched specifically among insensitive  
12 copies (**Figure 5**). This pattern of relaxation of constraint associated with one copy is also  
13 apparent at sites outside of those known to be functionally important sites (**Figure S4**). Both  
14 patterns are a strong indication of neo-functionalisation rather than merely sub-functionalisation  
15 of ATPα1. This may be expected given the age of the duplication event. Sub-functionalisation is  
16 expected to occur rapidly after duplication while neo-functionalisation takes place over longer  
17 timescales because it generally requires more mutations [73]. Most of the duplications of ATPα1  
18 in Apocynaceae-specialist insects detected so far are indeed ancient and trans-specific (**Figure**  
19 **3**).

20         Despite the expected signature of strong purifying selection on ATPα1 (**Figure 7**, **Table**  
21 **S4**), we have also detected the signature of positive selection on sites implicated in cardenolide-  
22 insensitivity and exhibiting frequent parallel substitution. Zou and Zhang [74] have pointed out  
23 that the observation of parallel substitution *per se* is not sufficient to infer adaptive significance  
24 since this pattern may be expected under a neutral model due to among-site differences in

1 physicochemical constraints. Some evidence against this argument in the case of the evolution of  
2 ATP $\alpha$ 1 target-site insensitivity is provided by the fact that Apocynaceae-specialist species are  
3 highly enriched for substitutions at sites implicated in cardenolide-sensitivity compared to non-  
4 specialist outgroups [30; this study]. Our finding of positive selection at some of these sites  
5 establishes a more direct link between adaptive protein evolution and recurrent parallel  
6 substitutions at sites implicated in cardenolide-sensitivity.

7         Interestingly, we have also detected signatures of positive selection at sites not previously  
8 implicated in cardenolide-sensitivity (**Table S4, Figure S1**). Some of these sites (e.g. 301, 560,  
9 563, 566 and 667) are located far from the cardenolide-binding domain of the enzyme and sites  
10 560, 563 and 566 are known to have roles in binding ATP. While this might seem to preclude  
11 direct roles in cardenolide-insensitivity, the existence of sites exhibiting allosteric effects on  
12 sensitivity is not unprecedented (e.g. 367 and 656, **Table S1**, [75]). This being said, the detection  
13 of positive selection at these sites may reflect selection pressures that are either only indirectly  
14 related or even unrelated to the evolution of cardenolide-insensitivity. Future functional  
15 experiments could be aimed at understanding the effects of these substitutions on cardenolide-  
16 insensitivity and overall enzyme performance.

17         Duplications of ATP $\alpha$ 1 feature prominently in the evolution of cardenolide-insensitivity  
18 in herbivorous insects. Given this feature, it will be interesting to compare patterns of recurrent  
19 parallel amino acid substitution in insects with vertebrates. Bufonid toads are among the few  
20 animals able to produce Na<sup>+</sup>, K<sup>+</sup>-ATPase-inhibiting compounds called “bufadienolides” that  
21 closely resemble cardenolides and act in the same way [76]. As a result, predators of bufonid  
22 toads represented by a wide variety of vertebrates are under pressure to evolve insensitivity to  
23 these compounds [77,78]. In contrast to insects, vertebrates retain at least three copies of ATP $\alpha$ ,  
24 (ATP1A1, ATP1A2, and ATP1A3), that are differentially expressed among tissues [79].

1 Previous studies have so far investigated the H1-H2 extracellular loop of ATP1A1 in bufonid  
2 toads and predatory frogs [77] and ATP1A3 of a number of predatory squamates [78,80]. It will  
3 be of considerable interest to further compare patterns of molecular evolution of cardenolide-  
4 sequestering insects to their bufonid predator analogs in the context of complete reconstructions  
5 of all three proteins.

6

### 7 **Acknowledgements**

8 We thank Patrick Reilly for help with *de novo* assemblies of transcriptomes and reconstruction of  
9 ATP $\alpha$ 1. We thank Shurong Hou for constructive comments on protein structure inferences. We  
10 thank Piotr Naskrecki (Gorongosa Restoration Project, Mozambique) for help in sample  
11 collection. This research was funded by NIH grant R01-GM115523 to P.A. Specimen collection  
12 and wet lab work in India was funded by a research grant from NCBS to K.K. Specimen  
13 collection in South Africa was funded by NSF grant DEB-1655097 to H.S.

14

### 15 **Data accessibility**

16 All raw RNA-seq sequence data generated for this study have been deposited in the National  
17 Center for Biotechnology Information Short Read Archive, [www.ncbi.nlm.nih.gov/sra](http://www.ncbi.nlm.nih.gov/sra)  
18 (BioProject PRJNA509040). Sequences of ATP $\alpha$ 1 used in our analysis have been submitted to  
19 Genbank under Accession numbers MK294065-81.

20

### 21 **Author contributions**

22 L.Y. and P.A. designed the study; N.R., R.M-P, R.D., and K.K. provided the samples; L.Y.  
23 performed the experimental work and analysed the data; M.W. contributed to Figure S3; A. R.

1 contributed to Figure S2; L.Y. and P.A. wrote the manuscript; H.S., and R.M-P. reviewed and  
2 edited.

3

#### 4 **References**

5

6 1. Stern D. 2010 *Evolution, development, and the predictable genome*. Roberts & Co.

7

8 2. Orr AH. 2005 The genetic theory of adaptation: a brief history. *Nature Rev. Genet.* **6**, 119.

9 (doi:10.1038/nrg1523)

10

11 3. Smith, J. M. 1970 Natural selection and the concept of a protein space. *Nature* **225**, 565–566.

12 (doi:10.1038/225563a0)

13

14 4. Losos JB. 2011 Convergence, Adaptation, and constraint. *Evolution* **65**, 1827–1840.

15 (doi:10.1111/j.1558-5646.2011.01289.x)

16

17 5. Leroi A, Rose M, Lauder G. 1994 What does the Comparative Method Reveal About

18 Adaptation? *Am. Nat.* **143**, 381–402. (doi:10.1086/285609)

19

20 6. Yukilevich R, Lachance J, Aoki F, True JR. 2008 Long-term adaptation of epistatic genetic

21 networks. *Evolution* **62**, 2215–2235. (doi:10.1111/j.1558-5646.2008.00445.x)

22

23 7. Rosenblum E, Parent CE, Brandt EE. 2014 The molecular basis of phenotypic convergence.

24 *Annu. Rev. Ecol. Evol. Syst.* **45**, 1–24. (doi:10.1146/annurev-ecolsys-120213-091851)

25

26 8. Hoekstra H, Coyne J. 2007 The locus of evolution: evo-devo and the genetics of adaptation.

27 *Evolution* **61**, 995–1016. (doi:10.1111/j.1558-5646.2007.00105.x)

28

29 9. Stern D, Orgogozo V. 2008 The loci of evolution: how predictable is genetic evolution?

30 *Evolution* **62**, 2155–2177. (doi:10.1111/j.1558-5646.2008.00450.x)

31

32 10. Streisfeld MA, Rausher MD. 2011 Population genetics, pleiotropy, and the preferential

33 fixation of mutations during adaptive evolution. *Evolution* **65**, 629–642. (doi:10.1111/j.1558-

34 5646.2010.01165.x)

35

36 11. Stern DL. 2013 The genetic causes of convergent evolution. *Nature Rev. Genet.* **14**, 751–64.

37 (doi:10.1038/nrg3483)

38

39 12. Storz J. 2016 Causes of molecular convergence and parallelism in protein evolution. *Nature*

40 *Rev. Genet.* **17**, 239–250. (doi:10.1038/nrg.2016.11)

41

42 13. Mithöfer A, Boland W. 2012 Plant defense against herbivores: chemical aspects. *Annu. Rev.*

43 *Plant Biol.* **63**, 431–50. (doi:10.1146/annurev-arplant-042110-103854)

44

45 14. Heckel DG. 2014 *Insect Detoxification and Sequestration Strategies*. *Annual Plant Reviews*.



- 1 47, 77–114. (doi:10.1002/9781118829783.ch3)  
2
- 3 15. Dobler S, Petschenka G, Pankoke H. 2011 Coping with toxic plant compounds – The insect’s  
4 perspective on iridoid glycosides and cardenolides. *Phytochemistry* **72**, 1593–1604.  
5 (doi:10.1016/j.phytochem.2011.04.015)  
6
- 7 16. Erb M, Robert CA. 2016 Sequestration of plant secondary metabolites by insect herbivores:  
8 molecular mechanisms and ecological consequences. *Curr. Opin. Insect Sci.* **14**, 8–11.  
9 (doi:10.1016/j.cois.2015.11.005)  
10
- 11 17. Lingrel JB. 2010 The physiological significance of the cardiotonic steroid/ouabain-binding  
12 site of the Na,K-ATPase. *Annu. Rev. Physiol.* **72**, 395–412. (doi:10.1146/annurev-physiol-  
13 021909-135725)  
14
- 15 18. Schoner W. 2002 Endogenous cardiac glycosides, a new class of steroid hormones. *Eur. J.*  
16 *Biochem.* **269**, 2440–2448. (doi:10.1046/j.1432-1033.2002.02911.x)  
17
- 18 19. Prassas I, Diamandis EP. 2008 Novel therapeutic applications of cardiac glycosides. *Nat.*  
19 *Rev. Drug Discov.* **7**, nrd2682. (doi:10.1038/nrd2682)  
20
- 21 20. Blaustein MP. 2017 The Pump, the exchanger and the holy spirit: origins of the endogenous  
22 ouabain-hypertension hypothesis and its 40 year evolution. *Am. J. Physiol. Cell Physiol.* **314**,  
23 ajpcell.00196.2017. (doi:10.1152/ajpcell.00196.2017)  
24
- 25 21. Lingrel J, Kuntzweiler T. 1994 Na<sup>+</sup>,K<sup>+</sup>-ATPase. *J. Biol. Chem.* **269**, 19659–19662.  
26
- 27 22. Schuler MA. 2011 P450s in plant–insect interactions. *Biochim. Biophys. Acta Proteins*  
28 *Proteom.* **1814**, 36–45. (doi:10.1016/j.bbapap.2010.09.012)  
29
- 30 23. Groen SC, LaPlante ER, Alexandre NM, Agrawal AA, Dobler S, Whiteman NK. 2017  
31 Multidrug transporters and organic anion transporting polypeptides protect insects against the  
32 toxic effects of cardenolides. *Insect Biochem. Mol. Biol.* **81**, 51–61.  
33 (doi:10.1016/j.ibmb.2016.12.008)  
34
- 35 24. Després L, David J-P, Gallet C. 2007 The evolutionary ecology of insect resistance to plant  
36 chemicals. *Trends Ecol. Evol.* **22**, 298–307. (doi:10.1016/j.tree.2007.02.010)  
37
- 38 25. Jungreis AM, Vaughan GL. 1977 Insensitivity of lepidopteran tissues to ouabain: Absence of  
39 ouabain binding and Na<sup>+</sup>,K<sup>+</sup>-ATPases in larval and adult midgut. *J. Insect Physiol.* **23**, 503–509.  
40 (doi:10.1016/0022-1910(77)90261-x)  
41
- 42 26. Petschenka G, Pick C, Wagschal V, Dobler S. 2013 Functional evidence for physiological  
43 mechanisms to circumvent neurotoxicity of cardenolides in an adapted and a non-adapted hawk-  
44 moth species. *Proc. R. Soc. B. Biol. Sci.* **280**, 20123089. (doi:10.1098/rspb.2012.3089)  
45
- 46 27. Holzinger F, Frick C, Wink M. 1992 Molecular basis for the insensitivity of the Monarch  
47 (*Danaus plexippus*) to cardiac glycosides. *FEBS Lett.* **314**, 477–80. (doi:10.1016/0014-  
48 5793(92)81530-Y)

- 1
- 2 28. Labeyrie E, Dobler S. 2004 Molecular adaptation of *Chrysochus* leaf beetles to toxic
- 3 compounds in their food plants. *Mol. Biol. Evol.* **21**, 218–21. (doi:10.1093/molbev/msg240)
- 4
- 5 29. Aardema ML, Zhen Y, Andolfatto P. 2012 The evolution of cardenolide-resistant forms of
- 6 Na<sup>+</sup>,K<sup>+</sup>-ATPase in Danainae butterflies. *Mol. Ecol.* **21**, 340–9. (doi:10.1111/j.1365-
- 7 294X.2011.05379.x)
- 8
- 9 30. Zhen Y, Aardema ML, Medina EM, Schumer M, Andolfatto P. 2012 Parallel Molecular
- 10 Evolution in an Herbivore Community. *Science* **337**, 1634–1637. (doi:10.1126/science.1226630)
- 11
- 12 31. Dobler S, Dalla S, Wagschal V, Agrawal AA. 2012 Community-wide convergent evolution
- 13 in insect adaptation to toxic cardenolides by substitutions in the Na,K-ATPase. *Proc. Natl. Acad.*
- 14 *Sci. U.S.A.* **109**, 13040–5. (doi:10.1073/pnas.1202111109)
- 15
- 16 32. Dobler S, Petschenka G, Wagschal V, Flacht L. 2015 Convergent adaptive evolution – how
- 17 insects master the challenge of cardiac glycoside-containing host plants. *Entomol. Exp. Appl.*
- 18 **157**, 30–39. (doi:10.1111/eea.12340)
- 19
- 20 33. Petschenka G, Wagschal V, von Tschirnhaus M, Donath A, Dobler S. 2017 Convergent
- 21 evolved toxic secondary metabolites in plants drive the parallel molecular evolution of insect
- 22 resistance. *Am. Nat.* **190**, S29–S43. (doi:10.1086/691711)
- 23
- 24 34. Dalla S, Dobler S. 2016 Gene duplications circumvent trade-offs in enzyme function: insect
- 25 adaptation to toxic host plants. *Evolution*, 2767–2777. (doi:10.1111/evo.13077)
- 26
- 27 35. Dalla S, Baum M, Dobler S. 2017 Substitutions in the cardenolide binding site and
- 28 interaction of subunits affect kinetics besides cardenolide sensitivity of insect Na,K-ATPase.
- 29 *Insect Biochem. Mol. Biol.* **89**, 43–50. (doi:10.1016/j.ibmb.2017.08.005)
- 30
- 31 36. Morris DH, Gostic KM, Pompei S, Bedford T, Łuksza M, Neher RA, Grenfell BT, Lässig M,
- 32 McCauley JW. 2018 predictive modeling of influenza shows the promise of applied evolutionary
- 33 biology. *Trends Microbiol.* **26**, 102–118. (doi:10.1016/j.tim.2017.09.004)
- 34
- 35 37. Mariño-Pérez R, Song H. 2017 Phylogeny of the grasshopper family Pyrgomorphidae
- 36 (Caelifera, Orthoptera) based on morphology. *Syst. Entomol.* (doi:10.1111/syen.12251)
- 37
- 38 38. Euw v. J, Fishelson L, Parsons J, Reichstein T, Rothschild M. 1967 Cardenolides (Heart
- 39 Poisons) in a grasshopper feeding on milkweeds. *Nature* **214**, 35–39. (doi:10.1038/214035a0)
- 40
- 41 39. Pugalenti P, Livingstone D. 1995 Cardenolides (Heart Poisons) in the painted grasshopper
- 42 *Poeciloceris pictus* F. (Orthoptera:Pyrgomorphidae) feeding on the milkweed *Calotropis*
- 43 *gigantea* L. (Asclepiadaceae). *J. N. Y. Entomol. Soc.* **103**, 191–196.
- 44
- 45 40. Seibt U, Kasang G, Wickler W. 2000 Suggested pharmacophagy of the African bushhopper
- 46 *Phymateus leprosus* (Fabricius) (Pyrgomorphidae, Orthoptera). *Zeitschrift Für Naturforschung C*
- 47 *J Biosci.* **55**, 442–8. (doi:10.1515/znc-2000-5-621)
- 48

- 1 41. Whitman DW. 1990 Grasshopper chemical communication. In *Biology of Grasshopper*, pp.  
2 357–391. John Wiley & Sons.
- 3
- 4 42. Rowell FC. 1967 Experiments on aggregations of *Phymateus purpurascens* (Orthoptera,  
5 Acrididae, Pyrgomorphinae). *J. Zool.* **152**, 179–193. (doi:10.1111/j.1469-7998.1967.tb01884.x)
- 6
- 7 43. Chapman R, Page W, McCaffery A. 1986 Bionomics of the variegated grasshopper  
8 (*Zonocerus variegatus*) in West and Central Africa. *Annu. Rev. Entomol.* **31**, 479–505.  
9 (doi:10.1146/annurev.en.31.010186.002403)
- 10
- 11 44. Rentz DC, Lewis RC, Su YN, Upton MS. 2003 *A Guide to Australian Grasshoppers and*  
12 *Locusts*. Natural History Publications.
- 13
- 14 45. Al-Robai AA. 1993 Different ouabain sensitivities of Na<sup>+</sup>/K<sup>+</sup>-ATPase from *Poekilocerus*  
15 *bufonius* tissues and a possible physiological cost. *Comp. Biochem. Physiol. B* **106**, 805–812.  
16 (doi:10.1016/0305-0491(93)90034-3)
- 17
- 18 46. Haas BJ *et al.* 2013 *De novo* transcript sequence reconstruction from RNA-seq using the  
19 Trinity platform for reference generation and analysis. *Nat. Protoc.* **8**, 1494–512.  
20 (doi:10.1038/nprot.2013.084)
- 21
- 22 47. Wang X *et al.* 2014 The locust genome provides insight into swarm formation and long-  
23 distance flight. *Nature Comm.* **5**, 2957. (doi:10.1038/ncomms3957)
- 24
- 25 48. Blankers T, Oh K, Genes SK. 2018 the genetics of a behavioral speciation phenotype in an  
26 island system. *Genes* **9**, 346. (doi:10.3390/genes9070346)
- 27
- 28 49. Zhao L, Zhang X, Qiu Z, Huang Y. 2018 *De novo* assembly and characterization of the  
29 *Xenocatantops brachycerus* Transcriptome. *Int. J. Mol. Sci.* **19**, 520.  
30 (doi:10.3390/ijms19020520)
- 31
- 32 50. Picelli S, Björklund ÅK, Reinius B, Sagasser S, Winberg G, Sandberg R. 2014 Tn5  
33 transposase and tagmentation procedures for massively scaled sequencing projects. *Genome Res.*  
34 **24**, 2033–2040. (doi:10.1101/gr.177881.114)
- 35
- 36 51. Zerbino DR, Birney E. 2008 Velvet: Algorithms for *de novo* short read assembly using de  
37 Bruijn graphs. *Genome Res.* **18**, 821–829. (doi:10.1101/gr.074492.107)
- 38
- 39 52. Schulz MH, Zerbino DR, Vingron M, Birney E. 2012 Oases: robust *de novo* RNA-seq  
40 assembly across the dynamic range of expression levels. *Bioinformatics* **28**, 1086–1092.  
41 (doi:10.1093/bioinformatics/bts094)
- 42
- 43 53. Li H. 2013 Aligning sequence reads, clone sequences and assembly contigs with BWA-  
44 MEM. *arXiv preprint arXiv:1303.3997*
- 45
- 46 54. Li H, Handsaker B, Wysoker A, Fennell T, Ruan J, Homer N, Marth G, Abecasis G, Durbin  
47 R. 2009 The sequence alignment/map format and samtools. *Bioinformatics* **25**, 2078–9.  
48 (doi:10.1093/bioinformatics/btp352)

- 1  
2 55. Anders, S., Pyl, P. & Huber, W. 2015 HTSeq—a Python framework to work with high-  
3 throughput sequencing data. *Bioinformatics* **31**, 166–169. (doi:10.1093/bioinformatics/btu638)  
4  
5 56. Pham TV, Jimenez CR. 2012 An accurate paired sample test for count data. *Bioinformatics*  
6 **28**, i596–i602. (doi:10.1093/bioinformatics/bts394)  
7  
8 57. Panfilio, K. *et al.* 2018 Molecular evolutionary trends and feeding ecology diversification in  
9 the Hemiptera, anchored by the milkweed bug genome. *Biorxiv*, 201731. (doi:10.1101/201731)  
10  
11 58. Yang Z. 1997 PAML: a program package for phylogenetic analysis by maximum likelihood.  
12 *Comput. Appl. Biosci.* **13**, 555–6. (doi:10.1093/bioinformatics/13.5.555)  
13  
14 59. Scheffer SJ, Winkler IS, Wiegmann BM. 2007 Phylogenetic relationships within the leaf-  
15 mining flies (Diptera: Agromyzidae) inferred from sequence data from multiple genes. *Mol*  
16 *Phylogenet Evol* **42**, 756–775. (doi:10.1016/j.ympev.2006.12.018 )  
17  
18 60. Yang Z, Nielsen R. 2002 Codon-substitution models for detecting molecular adaptation at  
19 individual sites along specific lineages. *Mol. Biol. Evol.* **19**, 908–917.  
20 (doi:10.1093/oxfordjournals.molbev.a004148)  
21  
22 61. Yang Z, Wong W, Nielsen R. 2005 Bayes empirical Bayes inference of amino acid sites  
23 under positive selection. *Mol. Biol. Evol.* **22**, 1107–1118. (doi:10.1093/molbev/msi097)  
24  
25 62. Zhang J, Nielsen R, Yang Z. 2005 Evaluation of an improved branch-site likelihood method  
26 for detecting positive selection at the molecular level. *Mol. Biol. Evol.* **22**, 2472–2479.  
27 (doi:10.1093/molbev/msi237)  
28  
29 63. Pegueroles C, Ferrés-Coy A, Martí-Solano M, Aquadro CF, Pascual M, Mestres F. 2016  
30 Inversions and adaptation to the plant toxin ouabain shape DNA sequence variation within and  
31 between chromosomal inversions of *Drosophila subobscura*. *Sci. Rep.* **6**, 23754.  
32 (doi:10.1038/srep23754)  
33  
34 64. Dalla S, Swarts HG, Koenderink JB, Dobler S. 2013 Amino acid substitutions of Na,K-  
35 ATPase conferring decreased sensitivity to cardenolides in insects compared to mammals. *Insect*  
36 *Biochem. Mol. Biol.* **43**, 1109–15. (doi:10.1016/j.ibmb.2013.09.006)  
37  
38 65. Price EM, Rice DA, Lingrel JB. 1989 Site-directed mutagenesis of a conserved, extracellular  
39 aspartic acid residue affects the ouabain sensitivity of sheep Na,K-ATPase. *J. Biol. Chem.* **264**,  
40 21902–6.  
41  
42 66. Freeman MR, Doherty J. 2006 Glial cell biology in *Drosophila* and vertebrates. *Trends*  
43 *Neurosci.* **29**, 82–90. (doi:10.1016/j.tins.2005.12.002)  
44  
45 67. Crambert G, Schaer D, Roy S, Geering K. 2004 New molecular determinants controlling the  
46 accessibility of ouabain to its binding site in human Na,K-ATPase alpha isoforms. *Mol.*  
47 *Pharmacol.* **65**, 335–41. (doi:10.1124/mol.65.2.335)  
48

- 1 68. Gould S, Vrba E. 1982 Exaptation—a missing term in the science of form. *Paleobiology* **8** 4-  
2 15. (doi:10.1017/S0094837300004310)  
3
- 4 69. Ananthakrishnan TN. 1994 Profiles of insect diversity. *Curr. Sci.* **66**, 271–281.  
5
- 6 70. Bernays E, Chapman R, Leather E, McCaffery A, Modder W. 1977 The relationship of  
7 *Zonocerus variegatus* (L.) (Acridoidea: Pyrgomorphidae) with cassava (*Manihot esculenta*).  
8 *Bull. Entomol. Res.* **67**, 391–404. (doi:10.1017/S0007485300011202)  
9
- 10 71. Bernays E, Edgar JA, Rothschild M. 1977 Pyrrolizidine alkaloids sequestered and stored by  
11 the aposematic grasshopper, *Zonocerus variegatus*. *J. Zool.* **182**, 85–87. (doi:10.1111/j.1469-  
12 7998.1977.tb04142.x)  
13
- 14 72. Rafaeli-Bestein A, Mordue W. 1978 The transport of the cardiac glycoside ouabain by the  
15 Malpighian tubules of *Zonocerus variegatus*. *Physiol. Entomol.* **3**, 59–63. (doi:10.1111/j.1365-  
16 3032.1978.tb00133.x)  
17
- 18 73. He X, Zhang J. 2005 Rapid subfunctionalization accompanied by prolonged and substantial  
19 neofunctionalization in duplicate gene evolution. *Genetics* **169**, 1157–1164.  
20 (doi:10.1534/genetics.104.037051)  
21
- 22 74. Zou Z, Zhang J. 2015 Are convergent and parallel amino acid substitutions in protein  
23 evolution more prevalent than neutral expectations? *Mol. Biol. Evol.* **32**, 2085–2096.  
24 (doi:10.1093/molbev/msv091)  
25
- 26 75. Kirley TL, Peng M. 1991 Identification of cysteine residues in lamb kidney (Na,K)-ATPase  
27 essential for ouabain binding. *J. Biol. Chem.* **266**, 19953–7.  
28
- 29 76. Krenn L, Kopp B. 1998 Bufadienolides from animal and plant sources. *Phytochemistry* **48**,  
30 1–29. (doi:10.1016/S0031-9422(97)00426-3)  
31
- 32 77. Moore DJ, Halliday DC, Rowell DM, Robinson AJ, Keogh J. 2009 Positive Darwinian  
33 selection results in resistance to cardioactive toxins in true toads (Anura: Bufonidae). *Biol. Lett.*  
34 **5**, 513–6. (doi:10.1098/rsbl.2009.0281)  
35
- 36 78. Ujvari B *et al.* 2015 Widespread convergence in toxin resistance by predictable molecular  
37 evolution. *Proc. Natl. Acad. Sci. U.S.A.* **112**, 11911–6. (doi:10.1073/pnas.1511706112)  
38
- 39 79. Herrera V, Emanuel J, Ruiz-Opazo N, Levenson R, Nadal-Ginard B. 1987 Three  
40 differentially expressed Na,K-ATPase alpha subunit isoforms: structural and functional  
41 implications. *J. Cell Biol.* **105**, 1855–1865. (doi:10.1083/jcb.105.4.1855)  
42
- 43 80. Ujvari B, Mun HC, Conigrave AD, Bray A, Osterkamp J, Halling P, Madsen T. 2013  
44 Isolation breeds naivety: island living robs Australian varanid lizards of toad-toxin immunity via  
45 four-base-pair mutation. *Evolution* **67**, 289–94. (doi:10.1111/j.1558-5646.2012.01751.x)  
46

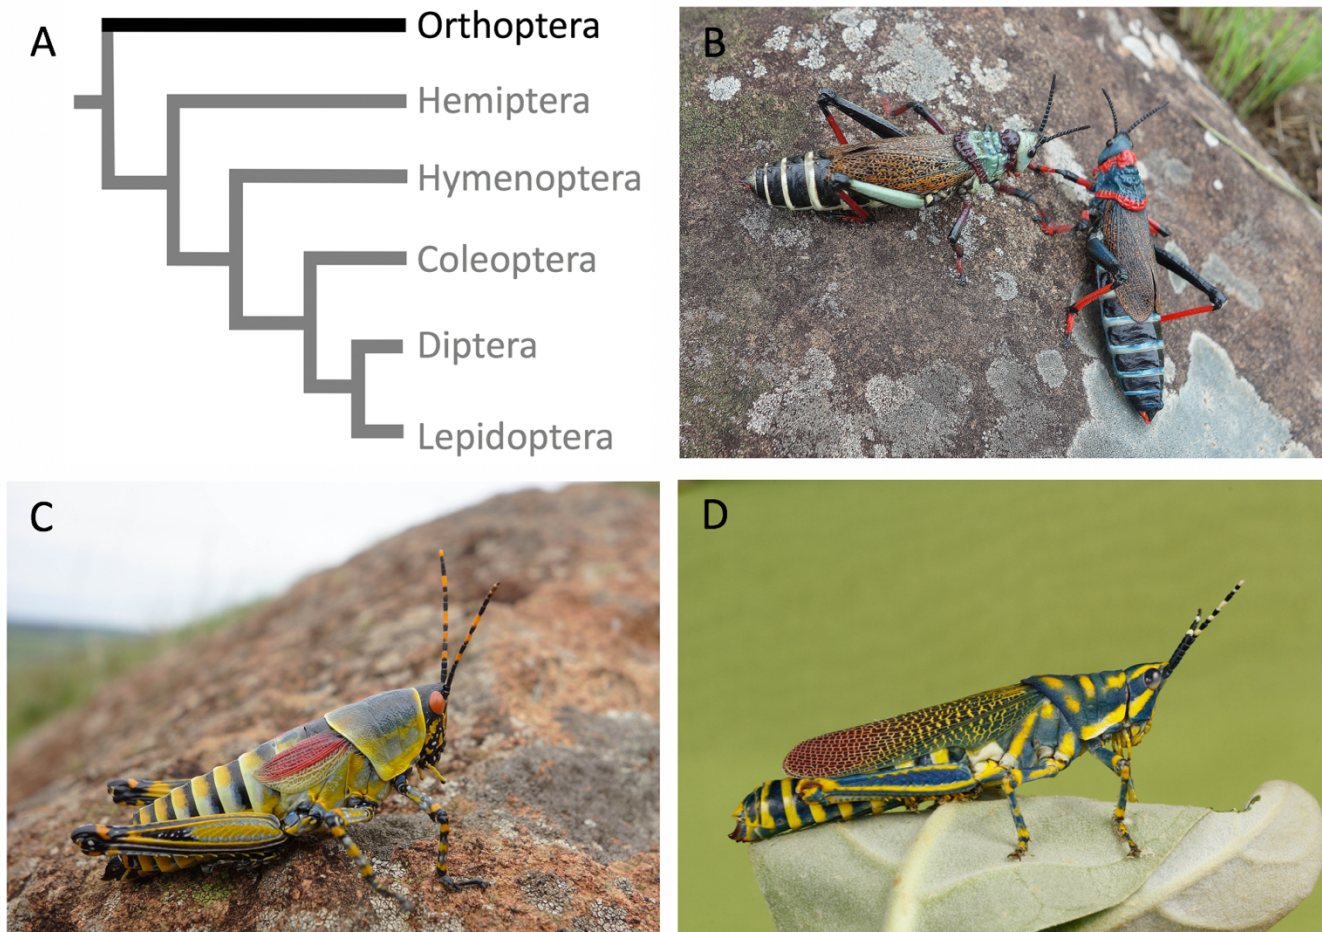

1  
2

3 **Figure 1.** Phylogeny (A) and representative members of the Orthoptera: Pyrgomorphidae (B-D).  
4 Orthopteran species shown are B) *Dictyophorus spumans* (South Africa); C) *Zonocerus elegans*  
5 (South Africa); D) *Poekilocerus pictus* (India).

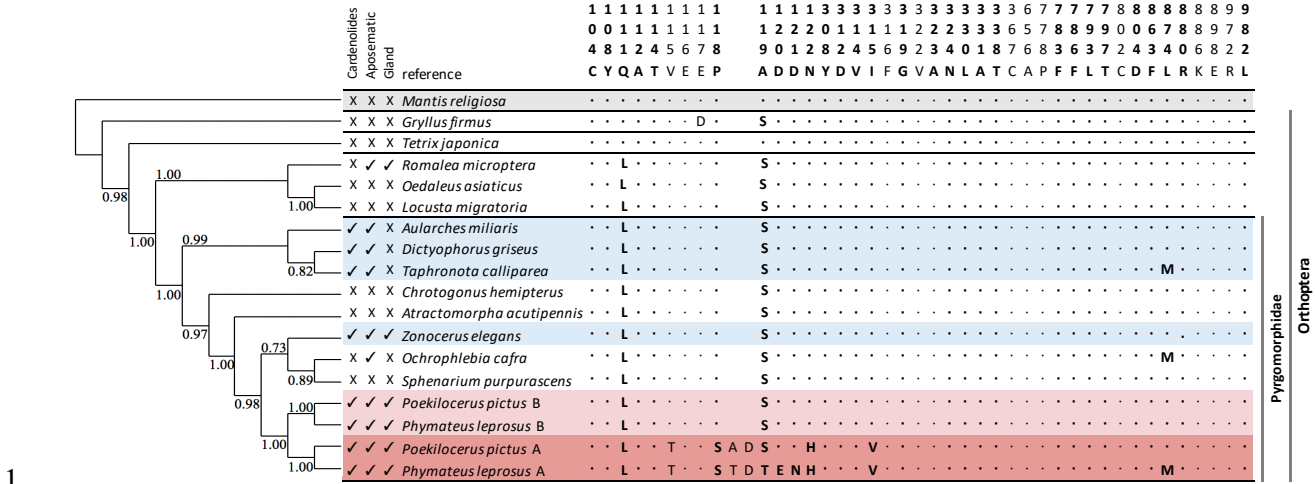

1  
2 **Figure 2.** Amino acid substitutions at sites implicated in cardenolide-sensitivity for ATPα1 of  
3 Orthopterans in the family Pyrgomorphidae and outgroups. Each family is separated by black  
4 lines. The coloured rows correspond to putatively cardenolide-adapted species that either possess  
5 only one copy (light blue) or two copies (light/dark red) of ATPα1. The non-Orthopteran  
6 outgroup (*Mantis religiosa*, order Mantodea) is shaded in grey. The numbering of sites is based  
7 on sheep ATP1A1 (*Ovis aries*) (Genbank: NC019458.2). Bold columns correspond to the sites  
8 for which site-directed mutagenesis studies suggest a role in cardenolide-sensitivity, while the  
9 rest were identified by structural prediction. Dots indicate identity with the reference, which  
10 represents the consensus sequence among non-specialist Arthropods. Letters represent amino  
11 acid substitutions relative to the reference. The cladogram was constructed using a maximum  
12 likelihood method implemented in SeaView based on protein-coding nucleotide sequences of  
13 ATPα1 with bootstrap values shown. “Cardenolide” refers to species feeding on Apocynaceae.  
14 “Aposematic” refers to the presence of warning colouration patterns. “Gland” refers to the  
15 presence of a specialised abdominal defensive gland that secrete toxic chemicals.

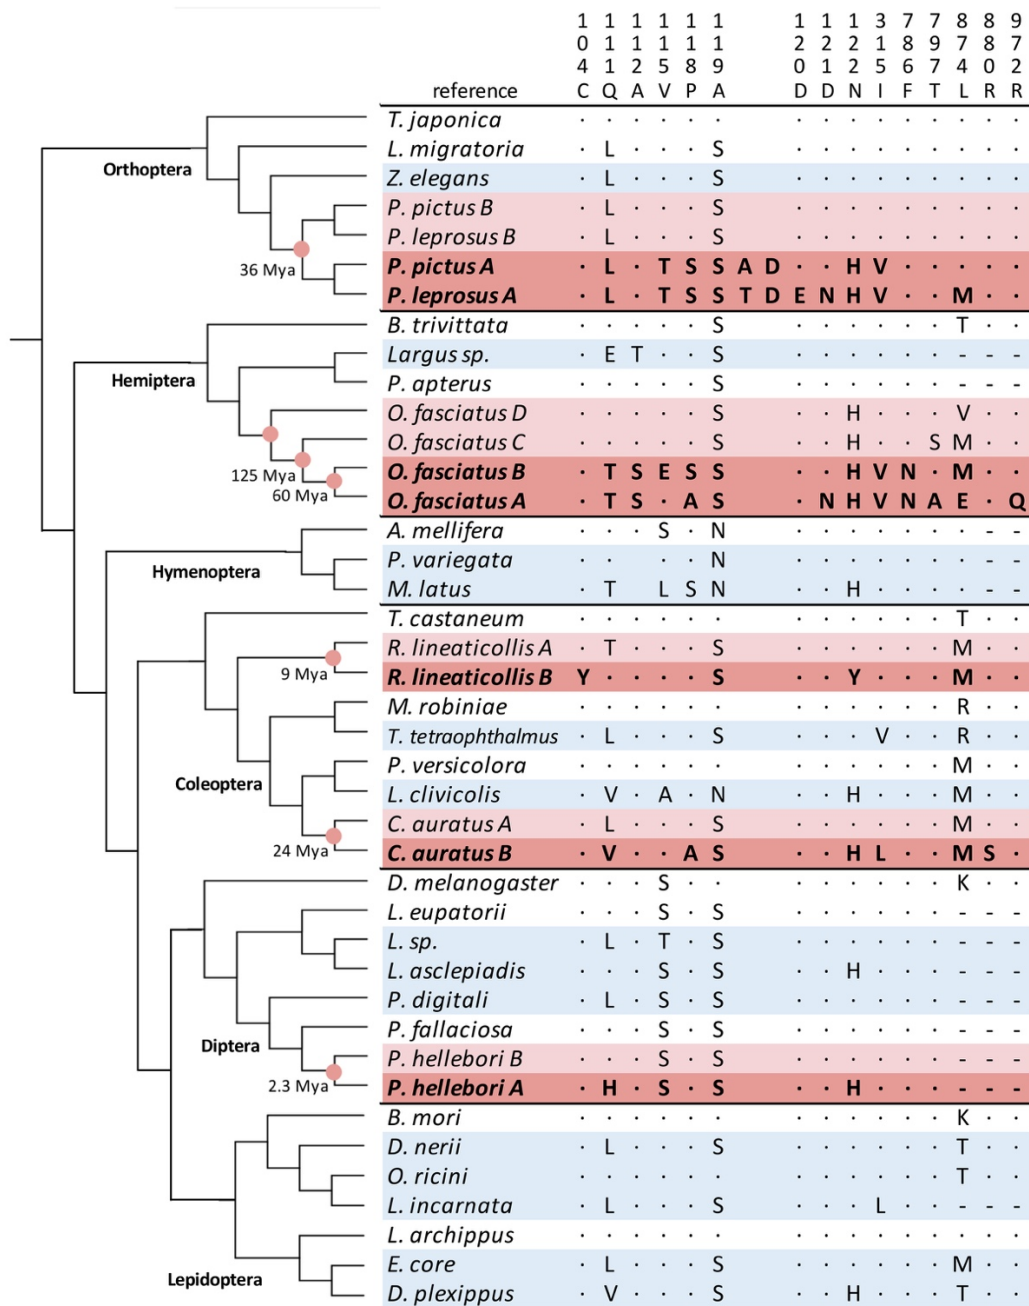

1  
2 **Figure 3.** Patterns of amino acid substitution and duplication spanning six insect orders. Shown  
3 are sites implicated in cardenolide binding (**Table S1**) at which substitutions have occurred. The  
4 colour scheme is consistent with **Figure 2**. Red circles indicate duplication events. The  
5 cladogram represents the relationships of insect orders and species phylogenies (see Methods).



1

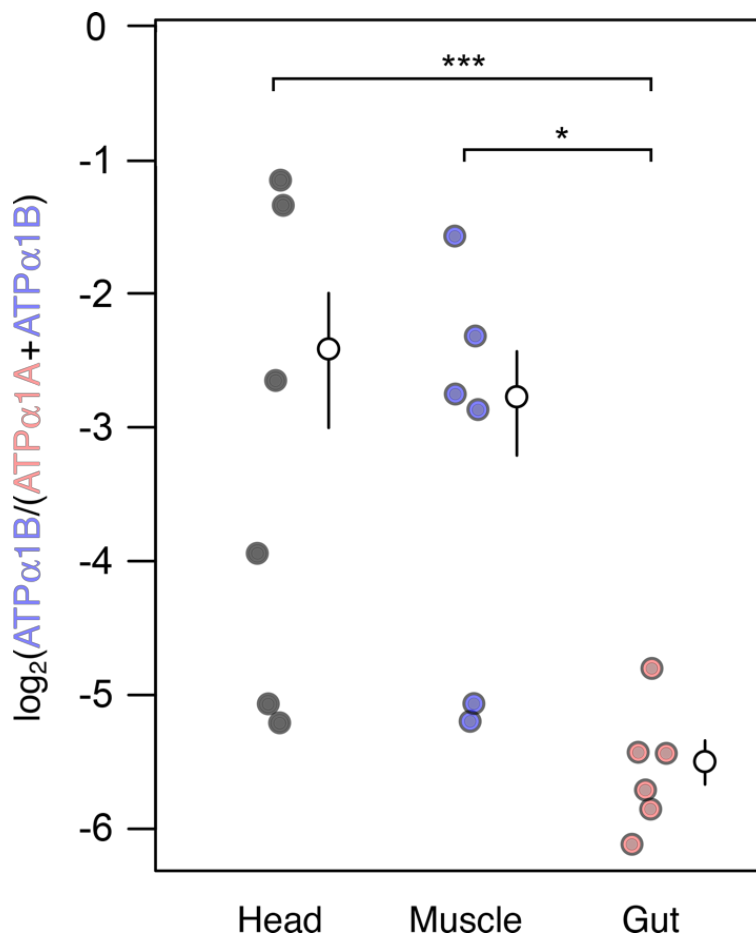

2  
3

4 **Figure 4.** RNAseq-based estimates of ATPα1 expression by tissue in the duplication-bearing  
5 Orthopteran *Poekilocerus pictus*. As observed in other Apocynaceae-specialists (Zhen *et al.*  
6 [29]), the relatively more cardenolide-sensitive ATPα1B is significantly less expressed in the gut  
7 than in head (corrected  $P = 8e-4$ ) and muscle (corrected  $P = 9e-4$ ) in *P. pictus* (**Table S3**). The  
8 mean proportion of ATPα1B of total ATPα1 is indicated with open circles with two standard  
9 errors as whiskers. P-values were estimated using the “inverted beta-binomial” test for paired  
10 sample count data (see Methods).

|                           | 1  | 1 | 1 | 1  | 1 | 1 | 1 | 1 | 1 | 3 | 7 | 7 | 8 | 9 |        |
|---------------------------|----|---|---|----|---|---|---|---|---|---|---|---|---|---|--------|
|                           | 0  | 1 | 1 | 1  | 1 | 1 | 2 | 2 | 2 | 1 | 8 | 9 | 8 | 7 |        |
|                           | 4  | 1 | 2 | 5  | 8 | 9 | 0 | 1 | 2 | 5 | 6 | 7 | 0 | 2 |        |
| Reference                 | C  | Q | A | V  | P | A | D | D | N | I | F | T | R | R | Totals |
| <i>Z. elegans</i>         | .  | L | . | .  | . | S | . | . | . | . | . | . | . | . | .      |
| <i>Largus sp.</i>         | .  | E | T | .  | . | S | . | . | . | . | . | . | . | . | .      |
| <i>P. variegata</i>       | .  | . | . | E  | . | N | . | . | . | . | . | . | . | . | .      |
| <i>M. latus</i>           | .  | T | . | E  | . | S | . | . | H | . | . | . | . | . | .      |
| <i>T. tetraophthalmus</i> | .  | L | . | .  | . | S | . | . | . | V | . | . | . | . | .      |
| <i>L. clivicolis</i>      | .  | V | . | A  | . | N | . | . | H | . | . | . | . | . | .      |
| <i>D. subobscura</i>      | .  | . | . | S  | . | S | . | . | . | . | . | . | . | . | .      |
| <i>Liriomyza sp.</i>      | .  | L | . | T  | . | S | . | . | . | . | . | . | . | . | .      |
| <i>L. asclepiadis</i>     | .  | . | . | S  | . | S | . | . | H | . | . | . | . | . | .      |
| <i>N. scrophula</i>       | .  | L | . | E  | . | S | . | . | . | . | . | . | . | . | .      |
| <i>P. digitalis</i>       | .  | L | . | S  | . | S | . | . | . | . | . | . | . | . | .      |
| <i>D. nerii</i>           | .  | L | . | .  | . | S | . | . | . | . | . | . | . | . | .      |
| <i>L. incarnata</i>       | .  | L | . | .  | . | S | . | . | L | . | . | . | . | . | .      |
| <i>E. core</i>            | .  | L | . | .  | . | S | . | . | . | . | . | . | . | . | .      |
| <i>D. plexippus</i>       | .  | V | . | .  | . | S | . | . | H | . | . | . | . | . | .      |
| Parallel                  | 12 | 2 | 1 | 11 |   |   | 5 | 2 |   |   |   |   |   |   | 38     |
| Unique                    | 1  | 1 | 2 |    |   |   |   |   |   |   |   |   |   |   | 4      |

  

|                                  |          |          |          |          |          |          |          |          |          |          |          |          |          |   |          |
|----------------------------------|----------|----------|----------|----------|----------|----------|----------|----------|----------|----------|----------|----------|----------|---|----------|
| <i>P. pictus B</i>               | .        | L        | .        | .        | .        | S        | .        | .        | .        | .        | .        | .        | .        | . | .        |
| <i>P. leprosus B</i>             | .        | L        | .        | .        | .        | S        | .        | .        | .        | .        | .        | .        | .        | . | .        |
| <b><i>P. pictus A</i></b>        | .        | L        | .        | T        | S        | S        | <b>A</b> | <b>D</b> | .        | H        | V        | .        | .        | . | .        |
| <b><i>P. leprosus A</i></b>      | .        | L        | .        | T        | S        | S        | <b>T</b> | <b>D</b> | <b>E</b> | <b>N</b> | H        | V        | .        | . | .        |
| <i>O. fasciatus D</i>            | .        | .        | .        | .        | .        | S        | .        | .        | H        | .        | .        | .        | .        | . | .        |
| <i>O. fasciatus C</i>            | .        | .        | .        | .        | .        | S        | .        | .        | H        | .        | .        | <b>S</b> | .        | . | .        |
| <b><i>O. fasciatus B</i></b>     | .        | <b>T</b> | <b>S</b> | <b>E</b> | <b>S</b> | <b>S</b> | .        | .        | H        | V        | <b>N</b> | .        | .        | . | .        |
| <b><i>O. fasciatus A</i></b>     | .        | <b>T</b> | <b>S</b> | .        | <b>A</b> | <b>S</b> | .        | .        | <b>N</b> | <b>H</b> | <b>V</b> | <b>N</b> | <b>A</b> | . | <b>Q</b> |
| <i>R. lineaticollis A</i>        | .        | T        | .        | .        | .        | S        | .        | .        | .        | .        | .        | .        | .        | . | .        |
| <b><i>R. lineaticollis B</i></b> | <b>Y</b> | .        | .        | .        | .        | S        | .        | .        | <b>Y</b> | .        | .        | .        | .        | . | .        |
| <i>C. auratus A</i>              | .        | L        | .        | .        | .        | S        | .        | .        | .        | .        | .        | .        | .        | . | .        |
| <b><i>C. auratus B</i></b>       | .        | <b>V</b> | .        | .        | <b>A</b> | <b>S</b> | .        | .        | <b>H</b> | <b>L</b> | .        | .        | <b>S</b> | . | .        |
| <i>P. hellebori B</i>            | .        | .        | .        | S        | .        | S        | .        | .        | .        | .        | .        | .        | .        | . | .        |
| <b><i>P. hellebori A</i></b>     | .        | <b>H</b> | .        | <b>S</b> | .        | <b>S</b> | .        | .        | <b>H</b> | .        | .        | .        | .        | . | .        |
| Parallel                         | 5        |          | 3        | 4        |          |          | 2        | 3        | 3        |          |          |          |          |   | 20       |
| Unique                           | 1        | 1        | 2        |          |          |          | 2        | 1        | 1        | 2        | 2        | 1        | 1        |   | 14       |

1  
2 **Figure 5.** The pattern of parallel versus unique substitutions at sites implicated in cardenolide-  
3 sensitivity with respect to duplication status of ATP $\alpha$ 1. Unique substitutions are indicated in red.  
4 Relatively less cardenolide-sensitive duplicate copies of ATP $\alpha$ 1 are highlighted in bold. Site 874  
5 was excluded from this analysis due to uncertainty in the reconstruction of ancestral states.

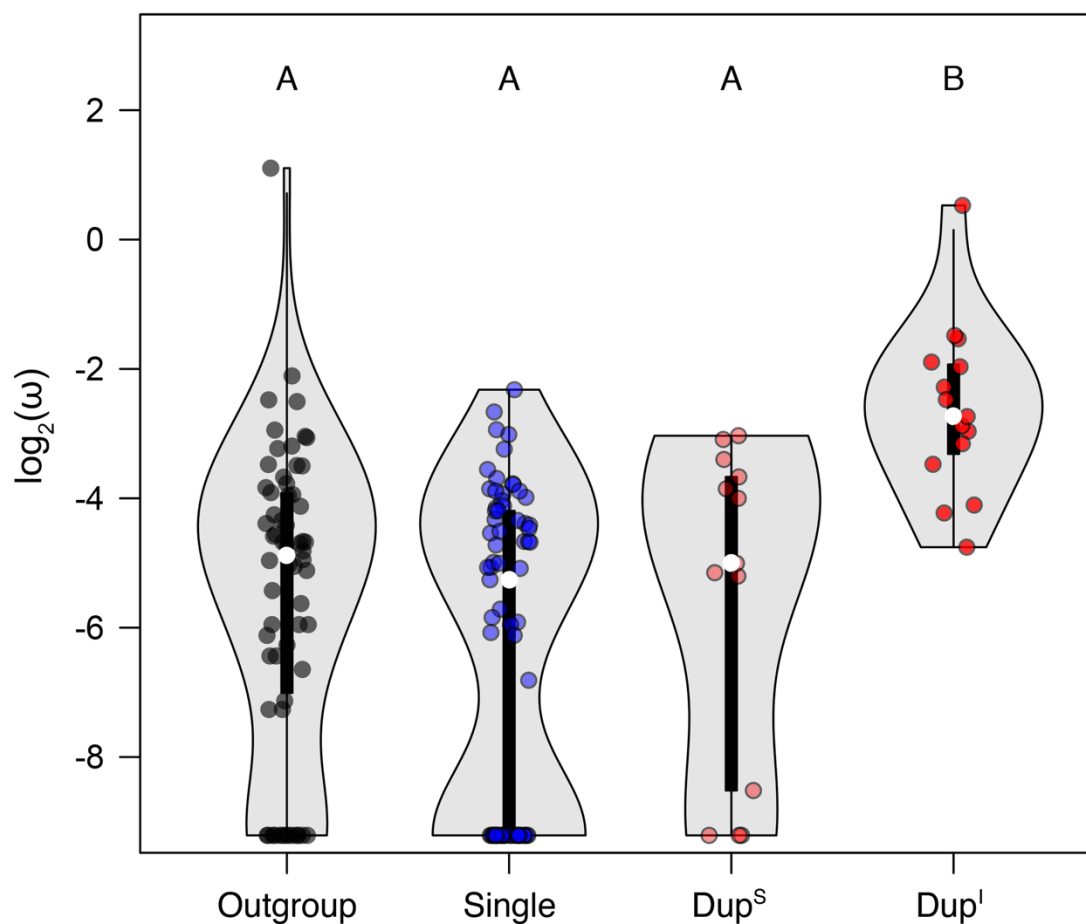

1  
2 **Figure 6.** The distributions of omega (dN/dS) estimates for ATP $\alpha$ 1 of non-specialists  
3 (Outgroup), Apocynaceae-specialists with a single copy of ATP $\alpha$ 1 (Single), and specialists with  
4 duplicated ATP $\alpha$ 1, where the relatively cardenolide sensitive and insensitive copies are noted as  
5 Dup<sup>S</sup> and Dup<sup>L</sup>, respectively. The median omega values are indicated with an open circle and  
6 bars represent 50% quantiles. There is a significant difference between the omega distributions  
7 for Dup<sup>L</sup> and those of all three other groups (Letters A and B indicate significantly different  
8 categories; Dup<sup>L</sup> vs Outgroup P=2e-5, Dup<sup>L</sup> vs Single P=3e-7, Dup<sup>L</sup> vs Dup<sup>S</sup> P=3e-3). P-values  
9 were estimated using Dunn's test of multiple comparisons using rank sums as implement in R  
10 (dunn.test) and adjusted using the Benjamini-Hochberg method.

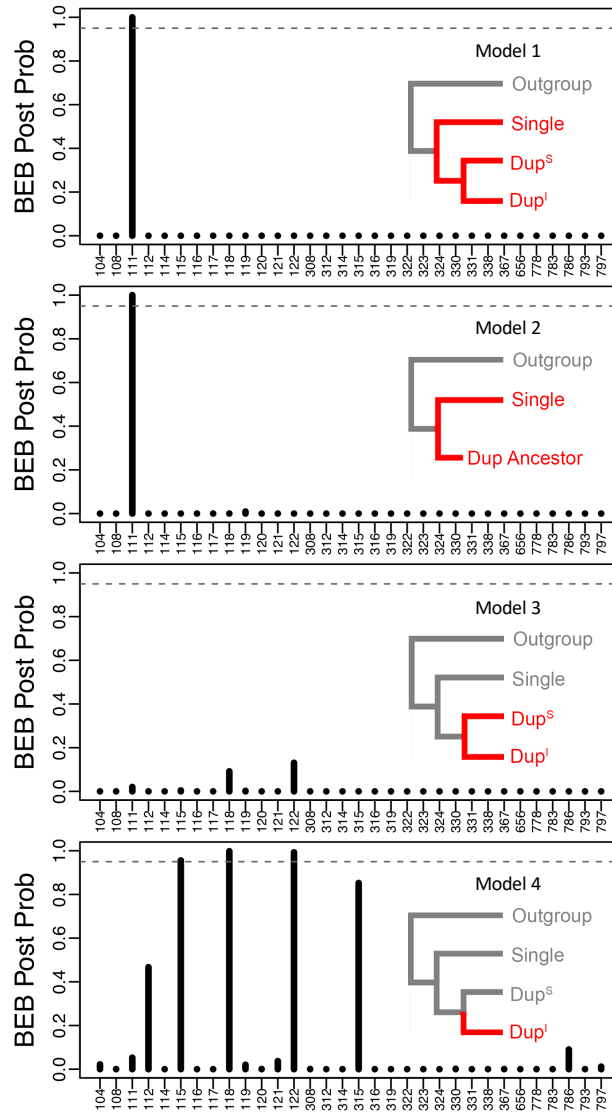

1  
2 **Figure 7.** Positively selected sites of ATP $\alpha$ 1 among 41 sites implicated in cardenolide-sensitivity  
3 (**Table S1**). Sites 802-982 were excluded from the analysis due to missing data. Models 1-4 were  
4 tested to identify sites experiencing lineage-specific positive selection. The schematic diagram of  
5 each model is shown to the right in each panel. Foreground lineages where positive selection  
6 took place are coloured in red and corresponding background lineages are grey. BEB posterior  
7 probability  $>0.95$  (grey dashed line) is considered to be strong evidence for positive selection.  
8 See **Table S5** for the list of positively selected sites across the whole ATP $\alpha$ 1 protein under each  
9 model.
