# Supplementary material for: Predictability in the evolution of Orthopteran cardenolide insensitivity
Source: bioRxiv or medRxiv preprint supplement (doi:10.1101/542811), 2019-02-07
Supplement: Supplementary file [file media-1.pdf]

1 **Supplementary materials**

2 **Table of Contents**

3  
4 **1. Supplementary Tables**

5 **Table S1.** Summary of sites in ATP $\alpha$ 1 implicated in cardenolide-binding by site-directed  
6 mutagenesis and structural studies.

7 **Table S2.** List of species and collection information.

8 **Table S3.** Raw RNA-seq read counts of ATP $\alpha$ 1A/B of *Poekilocerus pictus*.

9 **Table S4.** Probability of positively selected sites under different models.

10  
11 **2. Supplementary Figures**

12 **Fig. S1.** Amino acid sites implicated in cardenolide-binding on ATP1A1 crystal structure.

13 **Fig. S2.** Amino acid substitutions at the 41 sites implicated in cardenolide-binding.

14 **Fig. S3.** Relative expression of ATP $\alpha$ 1A-D in the head and gut of large milkweed bugs  
15 (*Oncopeltus fasciatus*).

16 **Fig. S4.** Distributions of lineage-specific omega (dN/dS) estimates for ATP $\alpha$ 1 excluding  
17 the 41 implicated in cardenolide-sensitivity.

18  
19 **3. Supplementary References**

1 **Table S1 Summary of sites in ATP $\alpha$ 1 implicated in cardenolide-sensitivity by site-directed**  
 2 **mutagenesis and structural studies.**

| Amino Acid Position | Location | Ancestral State | Derived States | Fold Change | References    |
|---------------------|----------|-----------------|----------------|-------------|---------------|
| 104                 | H1       | C               | F, A, Y        | 6.3-500     | [1,2]         |
| 108                 | H1       | Y               | A, D           | 9.1         | [2]           |
| 111                 | H1-H2    | Q               | R, H, L, V, T  | 3-12.5      | [3-5]         |
| 112                 | H1-H2    | A               | T, V, K        | -           | [6]           |
| 114                 | H1-H2    | T               | M, S           | -           | [6,7]         |
| 115                 | H1-H2    | S               | D              | -           | [6,8]         |
| 116                 | H1-H2    | E               | D, L           | -           | [6,8]         |
| 117                 | H1-H2    | E               | *              | -           | [8]           |
| 118                 | H1-H2    | P               | K, F           | 4.4         | [2]           |
| 119                 | H1-H2    | A               | S              | -           | [7]           |
| 120                 | H1-H2    | D               | R              | -           | [9]           |
| 121                 | H1-H2    | D               | E, N, A, S     | 25-60       | [10,11]       |
| 122                 | H1-H2    | N               | H, D           | 8-25        | [3-5,12]      |
| 308                 | H3-H4    | Y               | C, F           | 1.5-2.4     | [13]          |
| 312                 | H3-H4    | D               | R              | -           | [14]          |
| 314                 | H4       | V               | M              | -           | [14]          |
| 315                 | H4       | I               | V              | -           | [14]          |
| 316                 | H4       | F               | *              | -           | [8]           |
| 319                 | H4       | G               | A, S           | -           | [14,15]       |
| 322                 | H4       | V               | *              | -           | [8]           |
| 323                 | H4       | A               | *              | -           | [8]           |
| 324                 | H4       | N               | Y              | -           | [14]          |
| 330                 | H4       | L               | Q              | 7.9         | [16]          |
| 331                 | H4       | A               | G              | 3.1         | [16]          |
| 338                 | H4       | T               | N, A           | 3.2-3.3     | [16]          |
| 367                 | H4-H5    | C               | *              | -           | [17]          |
| 656                 | H4-H5    | A               | *              | -           | [17]          |
| 778                 | H5       | P               | A              | -           | [15,18]       |
| 783                 | H5       | F               | Y              | -           | [14]          |
| 786                 | H5       | F               | N, I           | 11-19       | [16,19]       |
| 793                 | H5-H6    | L               | P, N, K        | 2.8-118     | [12, 20]      |
| 797                 | H5-H6    | T               | A, V, N, C, S  | 40-67       | [13,19,21,22] |
| 802                 | H6       | C               | F              | -           | [16,20]       |
| 804                 | H6       | D               | E              | -           | [22]          |
| 863                 | H7       | F               | L              | 5.7         | [12]          |
| 874                 | H7-H8    | K               | S              | -           | [7]           |
| 880                 | H7-H8    | R               | P              | 7.9         | [23]          |
| 886                 | H7-H8    | K               | *              | -           | [8]           |
| 898                 | H7-H8    | E               | E              | -           | [7]           |
| 972                 | H9-H10   | R               | *              | -           | [8]           |
| 982                 | H10      | F               | S              | 6.3         | [17]          |

\* Revealed by structural prediction.

1 **Table S2. List of species and collection information**

| Species                          | Sex     | Life Stage | Tissue                                     | Location                                        | Collected by                                                |
|----------------------------------|---------|------------|--------------------------------------------|-------------------------------------------------|-------------------------------------------------------------|
| <i>Aularches miliaris</i>        | F       | Adult      | Head, muscle, gut, 3 biological replicates | Honey Valley, Karnataka, India                  | N. Achari, R. Deshmukh                                      |
| <i>Taphronota calliparea</i>     | F       | Adult      | Gut, antennae, mouthparts                  | Sofala, Cheringoma Plateu, Mozambique           | R. Mariño-Pérez                                             |
| <i>Dictyophorus griseus</i>      | F       | Adult      | Gut, antennae, mouthparts                  | Sofala, Cheringoma Plateu, Mozambique           | R. Mariño-Pérez                                             |
| <i>Chrotogonus hemipterus</i>    | F       | Adult      | Head                                       | Sofala, Gorongosa, Mozambique                   | R. Mariño-Pérez, B. Foquet                                  |
| <i>Atractomorpha acutipennis</i> | F       | Adult      | Head                                       | Sofala, Gorongosa, Mozambique                   | R. Mariño-Pérez, B. Foquet                                  |
| <i>Zonocerus elegans</i>         | M       | Adult      | Head                                       | KwaZulu-Natal, Mpophomeni Hill, South Africa    | H. Song, G. Cowper, R. Mariño-Pérez, A. Gomez               |
| <i>Poecilocerus pictus</i>       | M + F   | Adult      | Head, muscle, gut, 6 biological replicates | Chitoor, Andhra Pradesh, India                  | N. Achari, R. Deshmukh                                      |
| <i>Phymateus leprosus</i>        | unknown | Nymph      | Head, muscle, gut                          | KwaZulu-Natal, Ntunjambili Forest, South Africa | H. Song, G. Cowper, R. Mariño-Pérez, A. Armstrong, A. Gomez |
| <i>Sphenarium purpurascens</i>   | F       | Adult      | Head                                       | Oaxaca, Near La Colorada, Mexico                | R. Mariño-Pérez, B. Foquet, S. Sannabria-Urban, M.E. Pocco  |
| <i>Ochrophlebia cafra</i>        | F       | Adult      | Head                                       | KwaZulu-Natal, Hlabisa, South Africa            | H. Song, G. Cowper, R. Mariño-Pérez, A. Armstrong, A. Gomez |

2

1  
2**Table S3. Raw RNA-seq read counts of ATP $\alpha$ 1A/B of *Poekilocerus pictus***

|                | <b>Individual</b>               | <b>#1</b> | <b>#2</b> | <b>#3</b> | <b>#4</b> | <b>#5</b> | <b>#6</b> |
|----------------|---------------------------------|-----------|-----------|-----------|-----------|-----------|-----------|
| <b>Head</b>    | <b>ATP<math>\alpha</math>1A</b> | 1870      | 2145      | 1573      | 455       | 227       | 1365      |
|                | <b>ATP<math>\alpha</math>1B</b> | 52        | 1397      | 1283      | 14        | 43        | 95        |
|                | <b># mapped</b>                 | 7933248   | 11522005  | 15682417  | 18295987  | 7587412   | 14911717  |
| <b>Foregut</b> | <b>ATP<math>\alpha</math>1A</b> | 888       | 2943      | 457       | 975       | 3142      | 1022      |
|                | <b>ATP<math>\alpha</math>1B</b> | 21        | 70        | 17        | 19        | 46        | 18        |
|                | <b># mapped reads</b>           | 17148883  | 12282284  | 5196066   | 5702546   | 11186498  | 6746261   |
| <b>Thorax</b>  | <b>ATP<math>\alpha</math>1A</b> | 1641      | 1973      | 706       | 588       | 714       | 252       |
|                | <b>ATP<math>\alpha</math>1B</b> | 46        | 344       | 177       | 298       | 22        | 40        |
|                | <b># mapped reads</b>           | 11435872  | 12950380  | 11050566  | 8775458   | 24748961  | 20277512  |

3

1 **Table S4. Probability of positively selected sites under different models**

| Model No. | Model description                                                                                                                          | Schematic of model                                                                   | Positively selected sites                                                                                                                                                                  | BEB Prob.                                                                                                                                                                                          |
|-----------|--------------------------------------------------------------------------------------------------------------------------------------------|--------------------------------------------------------------------------------------|--------------------------------------------------------------------------------------------------------------------------------------------------------------------------------------------|----------------------------------------------------------------------------------------------------------------------------------------------------------------------------------------------------|
| 1         | Selection in all Apocynaceae-specialist lineages;                                                                                          | 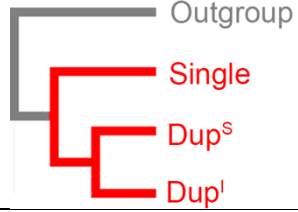   | <b>111 Q</b>                                                                                                                                                                               | <b>1.000*</b>                                                                                                                                                                                      |
| 2         | Selection on all Apocynaceae-specialist lineages with single copies of ATP $\alpha$ 1 (including ancestral lineages prior to duplication); |    | <b>111 Q</b>                                                                                                                                                                               | <b>1.000*</b>                                                                                                                                                                                      |
| 3         | Selection on all Apocynaceae-specialist lineages with duplicate copies of ATP $\alpha$ 1;                                                  |    | 301V<br>566 C                                                                                                                                                                              | 0.966*<br>0.952*                                                                                                                                                                                   |
| 4         | Selection on all putatively less-insensitive ATP $\alpha$ 1 duplicate lineages                                                             |   | 102 I<br>106 I<br><b>115 V</b><br><b>118 P</b><br><b>122 N</b><br>163 T<br>177 D<br>274 E<br><b>315 I</b><br>428 P<br>431 D<br>460 V<br>560 V<br>563 K<br>566 C<br>667 N<br>787 I<br>790 D | 0.953*<br>0.664<br><b>0.956*</b><br><b>0.998*</b><br><b>0.993*</b><br>0.997<br>0.787<br>0.568<br><b>0.852</b><br>0.553<br>0.530<br>0.690<br>0.980*<br>0.991*<br>0.996*<br>0.981*<br>0.659<br>0.544 |
| 5         | Selection on all outgroup lineages.                                                                                                        |  | None                                                                                                                                                                                       | None                                                                                                                                                                                               |

2 NOTE – Asterisks denote BEB posterior probability >0.95 Sites implicated in cardenolide-  
3 sensitivity are highlighted in bold. See Methods for more detail on models.

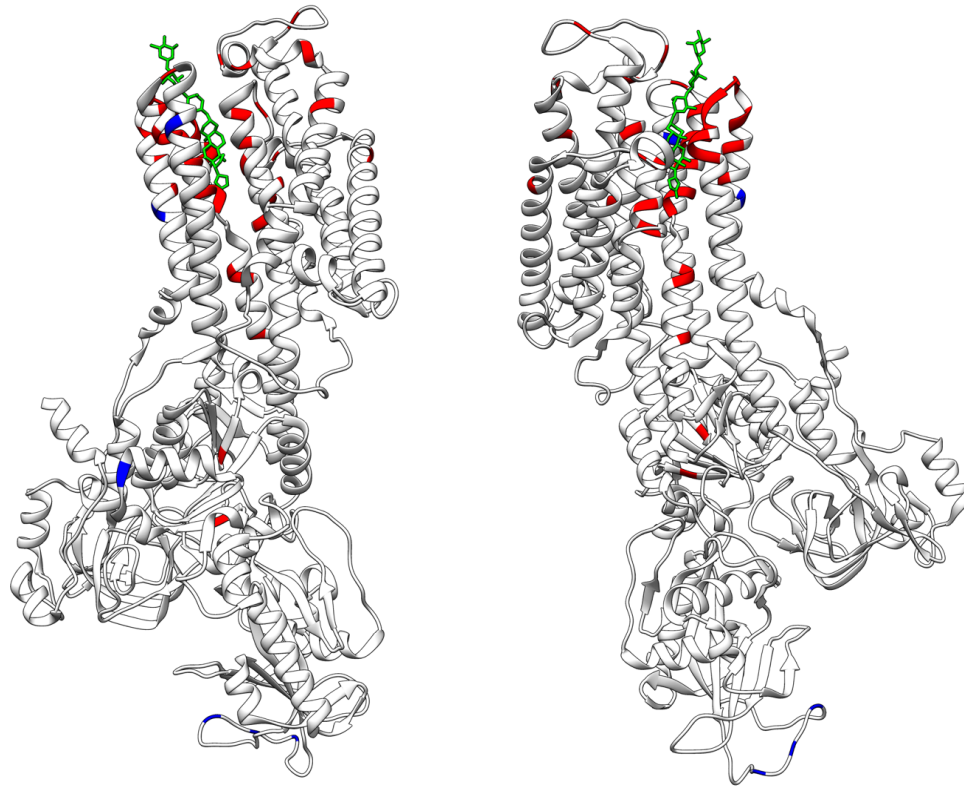

1  
2 **Figure S1.** Amino acid sites implicated in cardenolide-sensitivity shown on the ATP1A1 crystal  
3 structure. 41 amino acid sites (red) implicated in cardenolide-sensitivity are scattered throughout  
4 ATP1A1 (*Sus scrofa*, PDB 4RET). Sites in blue are additional sites that have been identified as  
5 positively-selected under one of the selection models evaluated in this study (**Figure 7** and **Table**  
6 **S5**). The bound cardenolide digoxin is shown in green.







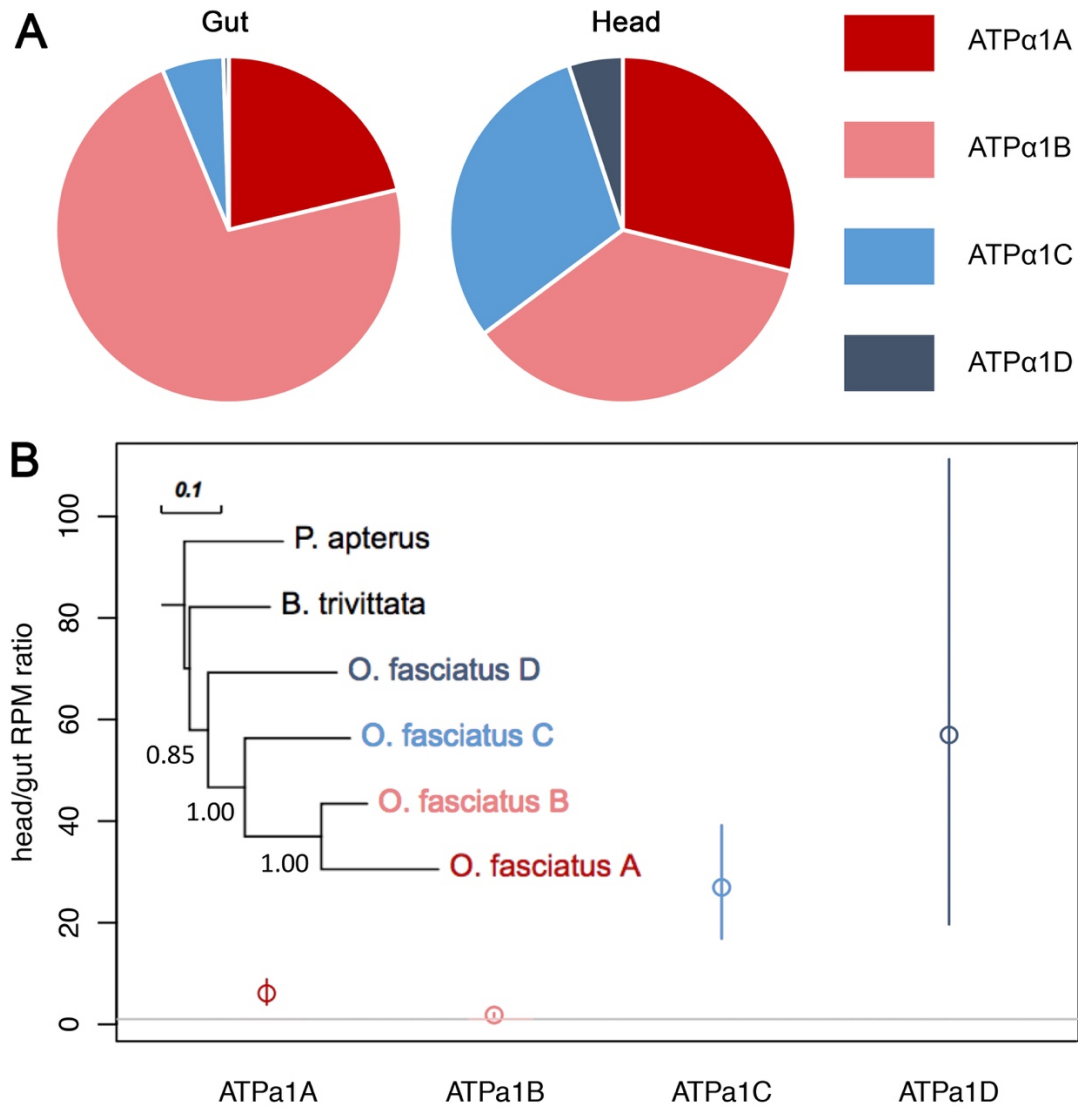

1

2 **Figure S3.** Relative expression of four ATPα1 copies in the head and gut of large milkweed bugs

3 (*Oncopeltus fasciatus*). **A**) The average percentages of ATPα1A-D of the total ATPα1 in both

4 gut and head. **B**) The normalised counts (reads per million, or RPM) ratio of head to gut. The

5 grey horizontal line represents the head/gut ratio of 1. Open circles and whiskers represent means

6 and approximate 95% confidence interval determined by bootstrap resampling the count data by

7 individual. The phylogeny was constructed using a maximum likelihood method implemented in

8 SeaView based on nucleotide-coding nucleotide sequences of ATPα1 with bootstrap values

9 shown.

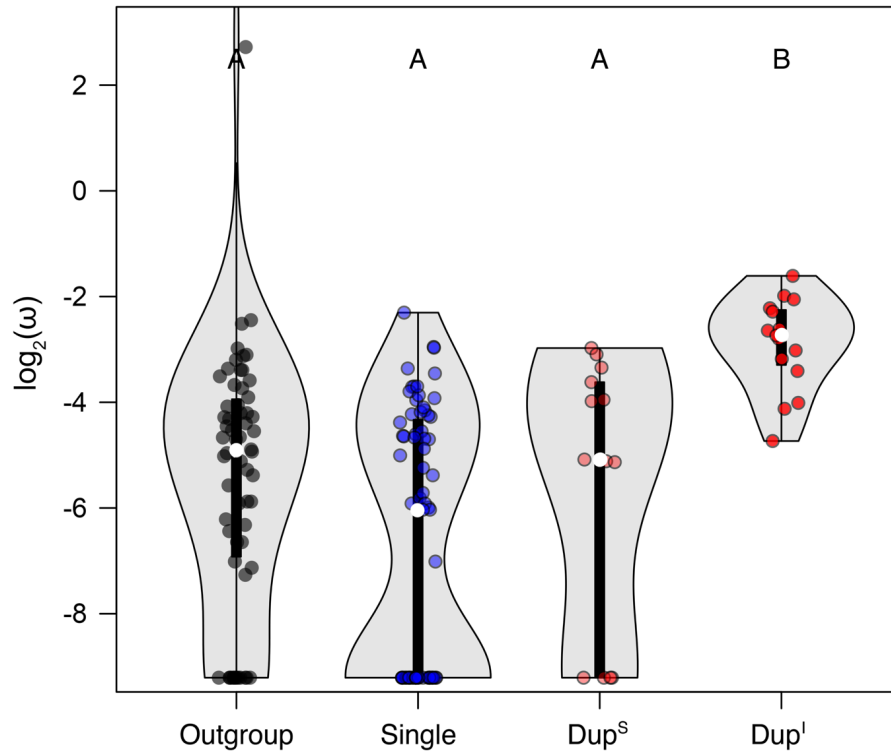

1  
2 **Figure S4.** Distributions of lineage-specific omega (dN/dS) estimates for ATP $\alpha$ 1 excluding the  
3 41 implicated in cardenolide-sensitivity. The distributions of omega estimates are shown with  
4 median and 95% confidence intervals. Letters A and B indicate significantly different categories.  
5 There is a significant difference between the omega ratios of Dup<sup>I</sup> and those of the three other  
6 groups (Dup<sup>I</sup> vs Outgroup P=6e-5, Dup<sup>I</sup> vs Single P=4e-8, Dup<sup>I</sup> vs Dup<sup>S</sup> P=3e-3). P-values were  
7 estimated using Dunn's test of multiple comparisons using rank sums as implement in R  
8 (dunn.test) and corrected using the Benjamini-Hochberg method.

## 1 Supplementary references

- 2 1. Canessa C, Horisberger J, Louvard D, Rossier B. 1992 Mutation of a cysteine in the first  
3 transmembrane segment of Na,K-ATPase alpha subunit confers ouabain resistance. *EMBO J.* **11**,  
4 1681–7. (doi: 10.1002/j.1460-2075.1992.tb05218.x)  
5
- 6 2. Schultheis P, Lingrel J. 1993 Substitution of transmembrane residues with hydrogen-bonding  
7 potential in the alpha subunit of Na,K-ATPase reveals alterations in ouabain sensitivity.  
8 *Biochemistry* **32**, 544–50. (doi:10.1021/bi00053a020)  
9
- 10 3. Price E, Rice D, Lingrel J. 1990 Structure-function studies of Na,K-ATPase: site-directed  
11 mutagenesis of the border residues from the H1-H2 extracellular domain of the alpha subunit. *J.*  
12 *Biol. Chem.* **265**, 6638–41.  
13
- 14 4. Canfield V, Emanuel J, Spickofsky N, Levenson R, Margolskee R. 1990 Ouabain-resistant  
15 mutants of the rat Na,K-ATPase alpha 2 isoform identified by using an episomal expression  
16 vector. *Mol. Cell. Biol.* **10**, 1367–72. (doi: 10.1128/MCB.10.4.1367)  
17
- 18 5. Dobler S, Dalla S, Wagschal V, Agrawal AA. 2012 Community-wide convergent evolution in  
19 insect adaptation to toxic cardenolides by substitutions in the Na,K-ATPase. *Proc. Natl. Acad.*  
20 *Sci. U.S.A.* **109**, 13040–5. (doi:10.1073/pnas.1202111109)  
21
- 22 6. Moore DJ, Halliday DC, Rowell DM, Robinson AJ, Keogh JS. 2009 Positive Darwinian  
23 selection results in resistance to cardioactive toxins in true toads (Anura: Bufonidae). *Biol. Lett.*  
24 **5**, 513–6. (doi:10.1098/rsbl.2009.0281)  
25
- 26 7. Crambert G, Schaer D, Roy S, Geering K. 2004 New molecular determinants controlling the  
27 accessibility of ouabain to its binding site in human Na,K-ATPase alpha isoforms. *Mol.*  
28 *Pharmacol.* **65**, 335–41. (doi:10.1124/mol.65.2.335)  
29
- 30 8. Ogawa H, Shinoda T, Cornelius F, Toyoshima C. 2009 Crystal structure of the sodium-  
31 potassium pump (Na<sup>+</sup>,K<sup>+</sup>-ATPase) with bound potassium and ouabain. *Proc. Natl. Acad. Sci.*  
32 *U.S.A.* **106**, 13742–7. (doi:10.1073/pnas.0907054106)  
33
- 34 9. Ujvari B, Mun HC, Conigrave AD, Bray A, Osterkamp J, Halling P, Madsen T. 2013 Isolation  
35 breeds naivety: island living robs Australian varanid lizards of toad-toxin immunity via four-  
36 base-pair mutation. *Evolution* **67**, 289–94. (doi:10.1111/j.1558-5646.2012.01751.x)  
37
- 38 10. Price EM, Rice DA, Lingrel JB. 1989 Site-directed mutagenesis of a conserved, extracellular  
39 aspartic acid residue affects the ouabain sensitivity of sheep Na,K-ATPase. *J. Biol. Chem.* **264**,  
40 21902–6.  
41
- 42 11. Lingrel J, Orłowski J, Price E, Pathak B. 1991 Regulation of the alpha-subunit genes of the  
43 Na,K-ATPase and determinants of cardiac glycoside sensitivity. *J. Gen. Physiol.* **46**, 1–16.  
44
- 45 12. Palasis M, Kuntzweiler T, Argüello J, Lingrel J. 1996 Ouabain interactions with the H5-H6  
46 hairpin of the Na,K-ATPase reveal a possible inhibition mechanism via the cation binding  
47 domain. *J. Biol. Chem.* **271**, 14176–82. (doi:10.1074/jbc.271.24.14176)

- 1  
2 13. Dalla S, Baum M, Dobler S. 2017 Substitutions in the cardenolide binding site and  
3 interaction of subunits affect kinetics besides cardenolide sensitivity of insect Na,K-ATPase.  
4 *Insect Biochem. Mol. Biol.* **89**, 43–50. (doi:10.1016/j.ibmb.2017.08.005)  
5
- 6 14. Canessa C, Horisberger J, Rossier B. 1993 Mutation of a tyrosine in the H3-H4 ectodomain  
7 of Na,K-ATPase alpha subunit confers ouabain resistance. *J. Biol. Chem.* **268**, 17722–6.  
8
- 9 15. Qiu LY, Krieger E, Schaftenaar G, Swarts HG, Willems PH, Pont JJ, Koenderink JB. 2005  
10 Reconstruction of the complete ouabain-binding pocket of Na,K-ATPase in gastric H,K-ATPase  
11 by substitution of only seven amino acids. *J. Biol. Chem.* **280**, 32349–55.  
12 (doi:10.1074/jbc.M505168200)  
13
- 14 16. Qiu LY, Swarts HG, Tonk EC, Willems PH, Koenderink JB, Pont JJ. 2006 Conversion of the  
15 low affinity ouabain-binding site of non-gastric H,K-ATPase into a high affinity binding site by  
16 substitution of only five amino acids. *J. Biol. Chem.* **281**, 13533–9.  
17 (doi:10.1074/jbc.M600551200)  
18
- 19 17. Croyle M, Woo A, Lingrel J. 1997 Extensive random mutagenesis analysis of the Na<sup>+</sup>/K<sup>+</sup>-  
20 ATPase alpha subunit identifies known and previously unidentified amino acid residues that alter  
21 ouabain sensitivity--implications for ouabain binding. *Eur. J. Biochem.* **248**, 488–95.  
22 (doi:10.1111/j.1432-1033.1997.00488.x)  
23
- 24 18. Kirley TL, Peng M. 1991 Identification of cysteine residues in lamb kidney (Na,K)-ATPase  
25 essential for ouabain binding. *J. Biol. Chem.* **266**, 19953–7.  
26
- 27 19. Burns E, Price E. 1993 Random mutagenesis of the sheep Na,K-ATPase alpha-1 subunit  
28 generates a novel T797N mutation that results in a ouabain-resistant enzyme. *J. Biol. Chem.* **268**,  
29 25632–5.  
30
- 31 20. Pont JJ, Swarts HG, Karawajczyk A, Schaftenaar G, Willems PH, Koenderink JB. 2009 The  
32 non-gastric H,K-ATPase as a tool to study the ouabain-binding site in Na,K-ATPase. *Pflugers*  
33 *Archiv : Eur. J. Physiol.* **457**, 623–34. (doi:10.1007/s00424-008-0467-8)  
34
- 35 21. Feng J, Lingrel J. 1994 Analysis of amino acid residues in the H5-H6 transmembrane and  
36 extracellular domains of Na,K-ATPase alpha subunit identifies threonine 797 as a determinant of  
37 ouabain sensitivity. *Biochemistry* **33**, 4218–24. (doi:10.1021/bi00180a015)  
38
- 39 22. Qiu LY, Koenderink JB, Swarts HG, Willems PH, Pont JJ. 2003 Phe783, Thr797, and  
40 Asp804 in transmembrane hairpin M5-M6 of Na<sup>+</sup>,K<sup>+</sup>-ATPase play a key role in ouabain  
41 binding. *J. Biol. Chem.* **278**, 47240–4. (doi:10.1074/jbc.M308833200)  
42
- 43 23. Schultheis P, Wallick E, Lingrel J. 1993 Kinetic analysis of ouabain binding to native and  
44 mutated forms of Na,K-ATPase and identification of a new region involved in cardiac glycoside  
45 interactions. *J. Biol. Chem.* **268**, 22686–94.  
46
